1                   **Development and Validation of a High-Throughput Short Sequence Typing Scheme**  
2                   **for *Serratia marcescens* Pure Culture and Environmental DNA**

3  
4 Thibault Bourdin<sup>a</sup>, Alizée Monnier<sup>a</sup>, Marie-Ève Benoit<sup>b</sup>, Emilie Bédard<sup>b</sup>, Michèle Prévost<sup>b</sup>,  
5 Caroline Quach<sup>c</sup>, Eric Déziel<sup>a#</sup>, Philippe Constant<sup>a#</sup>

6  
7 **Affiliations:**

8 <sup>a</sup>Institut national de la recherche scientifique, Centre Armand-Frappier Santé Biotechnologie, 531  
9 boulevard des Prairies, Laval (Québec), Canada, H7V 1B7.

10 <sup>b</sup>Department of Civil, Geological, and Mining Engineering, Polytechnique Montréal, CP 6079,  
11 Succ. Centre-ville, Montréal, QC, Canada H3C 3A7.

12 <sup>c</sup>Université de Montréal, Montréal, QC, Canada.

13  
14 #Address correspondence to Eric Déziel, [eric.deziel@inrs.ca](mailto:eric.deziel@inrs.ca) and Philippe Constant,  
15 [philippe.constant@inrs.ca](mailto:philippe.constant@inrs.ca)

16  
17 **E-mail address of authors:** T. Bourdin: [thibault.bourdin@inrs.ca](mailto:thibault.bourdin@inrs.ca) ; A. Monnier:  
18 [Alizee.Monnier@inrs.ca](mailto:Alizee.Monnier@inrs.ca) ; M-È. Benoit: [marie-eve.benoit.hsj@ssss.gouv.qc.ca](mailto:marie-eve.benoit.hsj@ssss.gouv.qc.ca) ; E. Bédard:  
19 [e.bedard@polymtl.ca](mailto:e.bedard@polymtl.ca) ; M. Prévost: [michele.prevost@polymtl.ca](mailto:michele.prevost@polymtl.ca) ; C. Quach :  
20 [c.quach@umontreal.ca](mailto:c.quach@umontreal.ca) ; E. Déziel: [eric.deziel@inrs.ca](mailto:eric.deziel@inrs.ca) ; P. Constant: [philippe.constant@inrs.ca](mailto:philippe.constant@inrs.ca)

21  
22 **Running Head:** HiSST Scheme for *Serratia marcescens*

23  
24 **Keywords:** Molecular typing, HiSST, Sink environment, Opportunistic pathogens, Neonatal  
25 intensive care units (NICU), healthcare-associated infections (HAI).

## 26 **Abstract**

27 Molecular typing methods are used to characterize the relatedness between bacterial isolates  
28 involved in infections. These approaches rely mostly on discrete loci or whole genome sequences  
29 (WGS) analyses of pure cultures. On the other hand, their application to environmental DNA  
30 profiling to evaluate epidemiological relatedness amongst patients and environments has received  
31 less attention. We developed a specific, high-throughput short sequence typing (HiSST) method  
32 for the opportunistic human pathogen *Serratia marcescens*. Genes displaying the highest  
33 polymorphism were retrieved from the core genome of 60 *S. marcescens* strains. Bioinformatics  
34 analyses showed that use of only three loci (within *bssA*, *gabR* and *dhaM*) distinguished strains  
35 with the same level of efficiency than average nucleotide identity scores of whole genomes. This  
36 HiSST scheme was applied to an epidemiological survey of *S. marcescens* in a neonatal intensive  
37 care unit (NICU). In a first case study, a strain responsible for an outbreak in the NICU was  
38 found in a sink drain of this unit, by using HiSST scheme and confirmed by WGS. The HiSST  
39 scheme was also applied to environmental DNA extracted from sink-environment samples.  
40 Diversity of *S. marcescens* was modest, with 11, 6 and 4 different sequence types (ST) of *gabR*,  
41 *bssA* and *dhaM* loci amongst 19 sink drains, respectively. Epidemiological relationships amongst  
42 sinks were inferred on the basis of pairwise comparisons of ST profiles. Further research aimed at  
43 relating ST distribution patterns to environmental features encompassing sink location, utilization  
44 and microbial diversity is needed to improve the surveillance and management of opportunistic  
45 pathogens.

46

47

## 48 **Introduction**

49 Interactions between patients and the built environment of the hospital has gained  
50 attention in epidemiological studies aimed at identifying origins of nosocomial outbreaks. For  
51 instance, sink environments are recognized as a source of opportunistic pathogens in several  
52 healthcare-associated infections (HAI) (1–3). In preventive or outbreak investigations, molecular  
53 typing methods are commonly used to examine the relatedness of environmental or clinical  
54 isolates. Many typing techniques are available to achieve this goal (4–10), mostly based on  
55 multilocus sequence typing (MLST) methodologies initially developed by Maiden et al. (11).  
56 Democratization of high-throughput sequencing technologies have contributed to expand public  
57 genome databases, providing an unprecedented portrait of microbial diversity. This has led to the  
58 realization that the pangenome of bacterial species displays a mosaic landscape supporting the  
59 metabolic flexibility necessary to ensure species resistance and resilience towards disturbances.  
60 Such plasticity of microbial genome highlights the need to update and revisit conventional MLST  
61 schemes, typically relying on housekeeping genes. In some instances, these genes are not specific  
62 enough for accurate molecular typing of investigated strains (12, 13).

63 The genus *Serratia* is a Gram-negative bacterium classified as members of  
64 Enterobacteriaceae that are ubiquitous in water, soil, plants and different hosts including insects,  
65 humans and other vertebrates (14, 15). Amongst *Serratia* species, *Serratia marcescens* is the  
66 most important opportunistic human pathogen, often multidrug resistant and involved in  
67 outbreaks of HAI in neonatal intensive care units (NICU) (16–26). No MLST scheme exists for  
68 the molecular typing of *S. marcescens* but other typing techniques have been used during  
69 previous epidemiological studies, such as pulsed-field gel electrophoresis (16, 18, 22), ribotyping  
70 (27) or more recently whole-genome MLST (28). Even though these techniques were proven  
71 efficient to distinguish strains, they are not tailored to epidemiological surveys involving large

72 sample size because they are technically demanding due to upstream cultivation and isolation  
73 efforts.

74 This study introduces a new molecular typing approach, that we called High-Throughput  
75 Short Sequence Typing (HiSST), to detect and identify *S. marcescens* relying on culture-  
76 dependent and culture-independent applications. The HiSST method was developed based on  
77 whole genome sequences of *S. marcescens* available in public databases then validated with  
78 reference culture collections, clinical isolates and environmental DNA samples.

79

## 80 **Materials and Methods.**

81 **Development of the HiSST scheme.** A pan-genome allele database was assembled from 60  
82 complete genomes of *S. marcescens* retrieved from the NCBI GenBank database (last updated in  
83 July 2020) with the *Build\_PGAdb* module available on PGAdb-builder online tool (29).  
84 Conserved genes showing the highest number of alleles were selected as the most variable and  
85 discriminant. Alleles of each selected genes ( $n = 32$ ) were aligned, non-overlapping ends were  
86 removed and sequence identity matrix was computed with the software BioEdit (30). Gene  
87 fragments (< 350 bp) displaying the highest variability were chosen and aligned against the NCBI  
88 database with the Basic Local Alignment Search Tool (BLAST) to assess specificity. The 15 loci  
89 (i.e. nucleotide sequences of internal fragments of the previously selected genes) showing the  
90 highest variability and with the most specific non-overlapping ends were selected as candidates  
91 for the HiSST scheme. A trade-off between the number of different loci and specificity of the  
92 assay was achieved by topology data analysis of concatenated HiSST loci and genome similarity.  
93 Three successive steps were necessary to implement the approach relying on the 60 complete  
94 genomes of *S. marcescens* (Table S1) and 9 other strains of non-*marcescens* *Serratia* spp.  
95 available on “GenBank” of NCBI. First, Average Nucleotide Identity (ANIb) (31) analyses were  
96 performed on the 69 complete genomes with BLAST+ alignment tool

97 (<https://ftp.ncbi.nlm.nih.gov/blast/executables/blast+/LATEST/>) with Python package *pyani*  
98 (<https://github.com/widdowquinn/pyani>) (32). Second, a stepwise approach was implemented to  
99 assemble concatenated loci alignments. Backward selection procedure was applied on the 15  
100 most discriminant loci until only three loci remained. This led to multiple concatenated  
101 alignments comprising either 15, 7, 4 or 3 gene fragments. ANIb scores were calculated on the  
102 concatenated alignments of loci. Third, the discriminating power of the four different HiSST  
103 schemes was validated by topology data analysis of concatenated loci and complete genomes  
104 trees. The topology of the different UPGMA dendrograms were compared with R version 4.0.4  
105 (33) using the packages *pvclust* (34), *dendextend* (35) and *tidyverse* (36). Further, ANIb values of  
106 the selected HiSST loci and complete genomes were compared using the packages *circlize* (37)  
107 and *ComplexHeatmap* (38), which help to visualize the difference of the discriminatory power  
108 between HiSST scheme and whole genome of *S. marcescens*. The R scripts we developed are  
109 available on GitHub ([https://github.com/TBourd/R\\_scripts\\_for\\_HiSST\\_scheme](https://github.com/TBourd/R_scripts_for_HiSST_scheme)). Following these  
110 analyses, the three gene fragments of *gabR* (HTH-type transcriptional regulatory protein), *bssA*  
111 (Benzylsuccinate synthase alpha subunit) and *dhaM* (PTS-dependent dihydroxyacetone kinase,  
112 phosphotransferase subunit) were retained for the further development of the HiSST scheme, as  
113 described below.

#### 114 115 **Primer design and PCR amplification of *gabR*, *bssA* and *dhaM* internal loci.**

116 Oligonucleotides comprising 18 to 22-mers with either a single or no substituted base were  
117 designed to target discriminant internal loci in the *gabR*, *bssA* and *dhaM* genes (Table 1). *In-*  
118 *silico* tests of primers were performed with the software tool “Primer-BLAST” (39), using the  
119 RefSeq non-redundant proteins database to assess specificity and the *Serratia marcescens* subset  
120 RefSeq database to verify the coverage of primers for this species. The reaction was carried out in  
121 25 µL of master mix containing 2.5 U/µL Fast-Taq DNA polymerase (Bio Basic Inc., Markham,

122 Canada), 1x of Fast-Taq Buffer (Bio Basic Inc., Markham, Canada), 200  $\mu$ M dNTPs, 0.4 mg/mL  
123 BSA (Bovine Serum Albumin), 0.4  $\mu$ M of each primer, and 2 ng/ $\mu$ L of extracted DNA. A  
124 solution of 0.5x Band Sharpener (Bio Basic Inc., Markham, Canada) was included for the *gabR*  
125 mixture only. PCR conditions were optimised for each primer sets with genomic DNA of *S.*  
126 *marcescens* strains as template (Table 1).

127  
128 **Validation of the HiSST scheme with reference strains.** Validation of primers was done with  
129 28 reference strains various origins (Table 2). Selected strains comprised *S. marcescens* ( $n = 15$ ),  
130 *Serratia rubidaea* ( $n = 1$ ), *Serratia liquefaciens* ( $n = 1$ ), *Serratia plymuthica* ( $n = 1$ ),  
131 *Pseudomonas aeruginosa* ( $n = 3$ ), *Klebsiella pneumoniae* ( $n = 1$ ), *Stenotrophomonas maltophilia*  
132 ( $n = 4$ ), *Stenotrophomonas acidaminiphila* ( $n = 1$ ) and *Stenotrophomonas nitritireducens* ( $n = 1$ ).  
133 The strains were purified on Trypticase Soy Broth (TSB) (Difco Laboratories, Sparks, MD, USA  
134 - Le pont de Claix, France) with Agar (15 g/L) (Alpha Biosciences, Inc., Baltimore, MD, USA) at  
135 30°C for 48 h. A single colony of each strain was inoculated in 2 mL TSB and grown for 48 h at  
136 30°C for subsequent genomic DNA extraction.

137  
138 **Validation of the HiSST scheme with environmental DNA.** Biofilm and 50 mL of water from  
139 ten different sink drains were sampled on April 2019 during an outbreak of *S. marcescens* in a  
140 neonatal intensive care unit (NICU) in a Montreal Hospital (Québec, Canada). The same day,  
141 samples were inoculated on a semi-selective DNase test agar (40) supplemented with ampicillin  
142 (5  $\mu$ g/ml), colistin (5  $\mu$ g/ml), cephalothin (10  $\mu$ g/ml), and amphotericin B (2.5  $\mu$ g/ml) incubated  
143 for 48 h at 30°C. Colonies were purified on TSB with Agar at 30°C for 48 h. During a second  
144 sampling campaign, biofilm and water (50 mL) from sink drains were collected twice from 19  
145 sinks in January 2020. Samples were kept on ice during their transportation to the laboratory.  
146 Genomic DNA from isolated strains and environmental samples was extracted by a procedure

147 combining mechanical and chemical lysis, using bead beater and ammonium acetate treatment, as  
148 previously described (41), prior to PCR amplicon sequencing. The two successive PCR  
149 amplifications necessary for the preparation of *gabR*, *bssA* and *dhaM* sequencing libraries were  
150 conducted with the AccuPrime™ *Taq* DNA Polymerase System, High Fidelity (Invitrogen Ltd,  
151 Carlsbad, USA). PCR conditions and reaction mixtures were adapted following manufacturer  
152 instructions (Table 1). The first PCR reaction was performed using modified *gabR*, *bssA* and  
153 *dhaM* primers including Illumina linker sequences (Table 1) and 2 ng/μL of template DNA. PCR  
154 products were purified with AMPure XP beads (Beckman Coulter Inc., Brea, USA). Purified  
155 PCR products were subjected to a second PCR performed for libraries preparation using barcoded  
156 primers (Table S2) supplied by Integrated DNA Technologies Inc. (Mississauga, Canada).  
157 Purified PCR amplicons were quantified using the Quant-iT™ PicoGreen™ dsDNA Assay Kit  
158 (Invitrogen Ltd, Carlsbad, USA), diluted and pooled together into 75 μL comprising 1.5 ng/μL of  
159 DNA final concentration before shipping for sequencing. PCR amplicons were sequenced with  
160 the Illumina MiSeq PE-250 platform at the Centre d'expertise et de services Génome Québec  
161 (Montréal, Canada). Raw sequencing reads processing included primer sequences removal with  
162 the software Cutadapt v. 2.10 (42), followed by quality control, paired ends merging and chimera  
163 check using the default parameters specified in the package dada2 v1.8.0 (43) that include  
164 packages ShortRead v1.48.0 (44) and Biostrings v2.58.0 (45). Reads containing a mismatch in  
165 the primer region were deleted (R script available on  
166 [https://github.com/TBourd/R\\_scripts\\_for\\_HiSST\\_scheme](https://github.com/TBourd/R_scripts_for_HiSST_scheme)). Filtered sequences were clustered  
167 into amplicon sequence variants (ASV) displaying 100% identity. ST assignation of chimera-free  
168 ASV was done using *gabR*, *bssA* and *dhaM* reference databases with a 100% identity cutoff  
169 (Table S1). Proportion of reads remaining after each step of the bioinformatics pipeline is  
170 provided in Table S2.

171

172 **SNP and HiSST-profile analyses.** SNPs of each locus were analyzed from all unique nucleotide  
173 sequence for references strains and environmental DNA (Table S3). For each strain, the  
174 combination of alleles at each locus defined the sequence type (ST), and the combination of  
175 multilocus ST defined the HiSST-profile. SNP matrix and HiSST-profile were analysed by  
176 geoBURST algorithm using PHYLOViZ platform, version 2.0a (46), creating minimum spanning  
177 trees using default software settings. The coverage of the HiSST scheme was visualized in a chart  
178 representing the cumulative frequency of ST depending on the number of cumulative loci, based  
179 on 60 references strains of *S. marcescens* (Table S1).

180  
181 **Validation of molecular typing by whole genome sequencing (WGS).** Environmental strain  
182 BD1b-2wD and clinical strains ED3957, ED3958, ED3959 were subjected to whole genome  
183 sequencing (WGS) with the Illumina NextSeq 550 platform at the Microbial Genome Sequencing  
184 Center (Pittsburgh, PA, USA). A quality control of the WGS data was checked with FastQC tool  
185 (<https://www.bioinformatics.babraham.ac.uk/projects/fastqc>). Illumina adapter clipping and  
186 quality trimming were performed with Trimmomatic v0.39 (47), by specifying an average quality  
187 required greater than 30. Then, genomes were assembled from fastq file of paired-end reads using  
188 SPAdes *de novo* assembler (48), and Bandage (49) to visualize SPAdes graphical output. Contigs  
189 obtained from SPAdes output were aligned, ordered and oriented with the closest reference  
190 genome (*S. marcescens* AR\_0122) to create a contiguated genome by using ABACAS tool (50).  
191 Pairwise comparison of contiguated genomes of DB1b-2wD, ED3957, ED3958 and ED3959 was  
192 performed using ANIm scores (calculation of ANI based on the MUMmer algorithm which is  
193 more adapted to compare genomes with high degree of similarity (51, 52)).

194  
195 **HiSST assignation.** The HiSST identification of an isolate is performed with a R script, and new  
196 HiSST profiles for unknown isolates are added to the HiSST database using the same script. The



197 HiSST scheme database and the R script called “HiSST-Assignment” are available on GitHub at  
198 URL: [https://github.com/TBourd/R\\_scripts\\_for\\_HiSST\\_scheme](https://github.com/TBourd/R_scripts_for_HiSST_scheme).

199  
200 **Accession number(s)**. Raw sequencing reads have been deposited in the Sequence Read Archive  
201 of the NCBI in the BioProject [PRJNA729113](#). Isolates raw sequencing reads are in BioSamples  
202 SAMN19117128 to SAMN19117139, and eDNA raw sequencing reads are in BioSamples  
203 SAMN19110658 to SAMN19110711. Assembled genomes of the environmental strain BD1b-  
204 2wD and clinical strains ED3957, ED3958, ED3959 have been deposited in the same BioProject  
205 [PRJNA729113](#) into BioSamples accessions SAMN19232018 to SAMN19232021.

## 206 **Results and Discussion**

### 207 **Design of the HiSST scheme**

208 Thirty two out of the 3,301 genes of *S. marcescens* pangenome were identified as the most  
209 variable with 29 to 30 alleles per gene. Only the most specific and discriminatory genes were  
210 kept, after stepwise alignment, examination of polymorphism amongst *S. marcescens* genomes  
211 and specificity check (Fig. 1). This led to the selection of 15 loci for subsequent analyses listed in  
212 Table S4. The minimal number of loci included in the HiSST scheme was selected by topology  
213 data analysis of concatenated HiSST loci and genome similarity (Fig. 2). We found that the  
214 dendrogram built from three loci has a similar topology to the cognate clustering analysis  
215 comprising the 15 most discriminatory loci, according to the downward loci selection procedure.  
216 This led to the selection of the three loci located in genes *gabR*, *bssA* and *dhaM* for the HiSST  
217 scheme. Each locus was discriminant, with more than 20% of nucleotide dissimilarity between *S.*  
218 *marcescens* strains and other species (Fig. S1). The locus *gabR* is more specific to *S. marcescens*  
219 species than *bssA*, followed by *dhaM*, with respectively more than 26%, 17% and 14% of  
220 nucleotide dissimilarity with *S. ficaria*, the closest relative species of *S. marcescens* for these loci.

221 The HiSST scheme based on these 3 loci differentiates most *S. marcescens* strains better  
222 than the ANI score based on their whole genomes (Fig. 3). The pairwise ANI genome similarity  
223 score is over 94% in its ability to distinguish *S. marcescens* strains from other *Serratia* species  
224 while only a few strains of *Serratia* spp. have more than 70% nucleotide identity with the three  
225 selected loci of *S. marcescens*. Classification of *S. marcescens* strains based on the HiSST-  
226 scheme is congruent with classification scheme relying on complete genome sequences (Fig. 2).  
227 A few differences between HiSST and whole genome-based classification were noticed amongst  
228 strains sharing more than 99.9% ANI score. At such a high similarity level, threshold delineating  
229 species, strains or clones is empirical, depending on examined species. For example, *P.*  
230 *aeruginosa* has high genomic plasticity mainly due to frequent horizontal gene transfers (53, 54),  
231 while *S. marcescens* has a higher genetic diversity at the sequence level according to PGAdB-  
232 builder results, with also genome flexibility (55). Additional factors to consider include the study  
233 context (e.g. precautionary principle for epidemiological studies tend to identify highly similar  
234 but not identical strains as non-clonal strain) and the method used (i.e. depending on the  
235 sensitivity of the molecular typing method and the sequencing platform used, the evolution of the  
236 technology and knowledge). As a whole, the minimal similarity threshold amongst *S. marcescens*  
237 strains is 89% for the three loci (Fig. S2 and based on BLAST results).

238

### 239 **Validation and application of the HiSST scheme.**

240 Specificity of primers targeting *gabR*, *bssA* and *dhaM* loci was first confirmed by Blast  
241 searches against RefSeq non-redundant proteins database. The efficacy and the specificity of the  
242 PCR assays was further confirmed with reference strains (Fig. S3). PCR amplicon of the correct  
243 size was observed for all *S. marcescens* strains ( $n = 15$ ) but not for *Serratia* sp. and other species  
244 of gammaproteobacteria. An accuracy test of HiSST scheme, including the bioinformatic  
245 procedure utilized to assign alleles to ST, was realized with reference strains *S. marcescens* Db11

246 and Db10. Genomic DNA of both strains was subjected to PCR amplicon sequencing with an  
247 average allocation of 1,000 reads per library. The HiSST-profile (ST 1) of both strains  
248 corresponded to the expected profile with a single ASV for each gene, supporting the accuracy of  
249 HiSST procedure and parameters utilized in sequence quality control (Fig. 4).

250         The method was applied to two different case studies realized in the same NICU. The first  
251 case study sought to compare the ST profile of a strain isolated from the sink-drain environment  
252 (BD1b-2wD) with three clinical strains (ED3657, ED3658, ED3659) from patients admitted in  
253 that NICU, where an outbreak occurred – as determined by the Infection prevention and control  
254 team based on PFGE profiles, relatedness in space and time. Molecular typing of the  
255 environmental strain BD1b-2wD and clinical strains revealed very close relatedness, all four  
256 having an identical HiSST-profile ST 47 (Fig. 5A). WGS was done for each strain to challenge  
257 HiSST scheme result. Pairwise comparison of contiguated genomes confirmed the high degree of  
258 similarity between each strain (ANIm > 99.7%). In principle, *bssA* and *gabR* are sufficient to  
259 ensure diversity coverage of ST represented in genome database (Fig. 5B) but inclusion of *dhaM*  
260 in the HiSST-scheme is included to prevent false-negative results (i.e., in the case where the  
261 targeted gene is absent or subject to unknown mutations) and allows to distinguish environmental  
262 or clinical origin of *S. marcescens* strains for culture-based diagnostic (Fig. 5A). These results  
263 suggest that the environmental BD1b-2wD strain and clinical isolates descend from a single cell,  
264 while providing supplementary experimental evidence supporting the specificity of the HiSST  
265 scheme.

266         The second case study was conducted to explore diversity of *S. marcescens* by applying  
267 the HiSST method to environmental DNA (eDNA). PCR amplicon sequencing of each loci was  
268 done to report diversity of each ST-locus separately for a culture-independent epidemiological  
269 investigation. All retrieved ASV sequences were specific to *S. marcescens*. Diversity amongst the  
270 19 sinks was modest, with 11, 6 and 4 different alleles of *gabR*, *bssA* and *dhaM* found,

271 respectively (Fig. 4). A single allele was dominant in each sample, with a relative abundance of  
272 70-100% (Table S2). Either a single or two allele(s) per sample were observed for *gabR* and  
273 *dhaM* loci, whereas *gabR* was represented by up to three different alleles per sample. For the  
274 three HiSST loci, rare alleles differ from the dominant allele in the same sample by 1-6 SNPs,  
275 suggesting the presence of other strains in the drain. Artificial inflation of diversity caused by  
276 sequencing errors is less likely due to the stringent filtering process of sequences (cf. Materials  
277 and methods) and the low error probability of incorrect base-call for short sequences (56). The  
278 intercomparison of ST profiles amongst the 19 sinks of the NICU was done to infer potential  
279 epidemiological links (Fig. 6). The most straightforward link between sink environments is the  
280 case where ST profiles are identical. This situation was observed in sinks #72 and #73 for  
281 dominants ASV (*bssA*-ST 36, *gabR*-ST 18, *dhaM*-ST 2) that are likely colonized by the same *S.*  
282 *marcescens* strain. This link is supported by the proximity of both sinks in the NICU, with the  
283 same drain connection and interconnection through handwashing (57, 58). The sink #PLM shared  
284 two ST detected in sinks #72 and #73 (*bssA*-ST 36 and *dhaM*-ST 2) and two ST in sink #80  
285 (*gabR*-ST 2 and *dhaM*-ST 2). This result suggests an epidemiological link between the four sinks  
286 related to one another by the sink #PLM (that is used for the initial handwashing at the NICU  
287 entrance). Finally, HiSST-profile (ST 2) of sink #80 is identical to *S. marcescens* 95 and BWH-  
288 35 strains included in the reference genome database, suggesting the colonization by a  
289 taxonomically closely-related strain. *S. marcescens* 95 and BWH-35 were isolated from sputum  
290 in a Boston hospital (USA) and are most likely variants of the same strain.

291 A limitation of the method was noticed in sink #55 where no PCR detection of *dhaM* was  
292 observed with positive amplification of *gabR* and *bssA* genes. Although this can be explained by  
293 low level of *S. marcescens* in this sink combined with different amplification efficiencies  
294 between the three reactions, examination of future genome sequences deposited in public  
295 database will be necessary to confirm the ubiquitous distribution of *dhaM* in *S. marcescens*.

296           These case studies illustrate the strengths of the HiSST scheme to identify clones and its  
297 broad applicability for epidemiological investigations. Beyond the conventional application of the  
298 method to genotype isolates, examination of eDNA offers a complementary tool for the source  
299 tracking of opportunistic pathogens. This could be done by the monitoring of bacterial succession  
300 in NICU environment and patient samples through HiSST eDNA profiling. Under that  
301 framework, a convergence of HiSST profiles along spatial or temporal sampling sequences would  
302 provide strong evidence of opportunistic pathogen transfer across different environments.

303           In contrast to conventional application for isolate identification, HiSST profile analysis  
304 from eDNA is less prone to misinterpretation or aborted analysis for samples displaying no signal  
305 for certain genes. Indeed, the pairwise comparison of HiSST bacterial profiles can be expressed  
306 as a pairwise Jaccard distance computed with presence or absence score for detected or non-  
307 detected ST, respectively. Downstream clustering and multivariate analyses offer options to  
308 correlate ST distribution patterns with environmental features encompassing sink location,  
309 utilization, and microbial diversity (Fig. 6). Although this approach is a gold standard in  
310 microbial ecology, the second case study presented in this article is the first culture-independent  
311 application of ST profile analysis of opportunistic pathogens for epidemiologic survey.

312           In conclusion, a combination of *in silico* analyses led to the development of a powerful  
313 HiSST assay to identify isolates of *S. marcescens* species. The approach relying on pangenome  
314 examination rather than selection of conventional housekeeping genes contributed to the method  
315 specificity. For instance, conventional MLST schemes for *P. aeruginosa* and *S. maltophilia* are  
316 less specific than the HiSST method developed here for *S. marcescens*. Application of the  
317 procedure presented in this article to these other opportunistic pathogens of environmental origin  
318 led to more robust HiSST-schemes (T. Bourdin et al., unpublished). Despite the precision of the  
319 method presented here, specificity and coverage of the HiSST scheme will require regular  
320 validation and update with the addition of new genome sequences in public databases. The

321 bioinformatic pipeline implemented here or alternative methods (59) will facilitate regular update  
322 of the HiSST scheme. This fact holds true for any molecular classification tool. Even though  
323 comparison of whole genomes appears as the most robust method (12), public genome databases  
324 contain contaminations that may introduce biases for the identification of highly similar strains  
325 (60). In addition, the high proportion of similar or identical genes in whole genome hides some  
326 dissimilarities between isolates, while HiSST highlights the most discriminating alleles. Thus, a  
327 combination of whole genome sequencing and high discriminatory molecular typing method is  
328 recommended for culture-dependant epidemiological investigation (61). Beside isolate  
329 identification, the HiSST method proved efficient for ST comparison and source tracking  
330 purposes of *S. marcescens* in eDNA samples without the need for culture.

331         Based on these results, the following epidemiological interpretations for molecular typing  
332 of isolates when using HiSST scheme are proposed: (i) isolates that are identified by at least 2 of  
333 3 HiSST-loci are confirmed as *S. marcescens*, (ii) isolates with an identical HiSST-profile (i.e.  
334 identical *gabR*-ST, *bssA*-ST and *dhaM*-ST) are most likely clones and belong to the same  
335 genotype, (iii) isolates that differ by 2 or 3 HiSST-loci are mostly unrelated and do not belong to  
336 the same genotype. For an epidemiological survey on eDNA samples when using HiSST scheme  
337 described here, the following interpretations are proposed: (i) eDNA samples with ST  
338 corresponding to the HiSST scheme indicate the presence of *S. marcescens*, (ii) eDNA samples  
339 with several ST of one HiSST-locus indicate the presence of several *S. marcescens* strains, and  
340 (iii) samples with identical HiSST-profile are harbouring by very closely related strains and  
341 sampled environment are most likely linked.

## 342 **Acknowledgments**

343 We thank the hospital staff for help in sampling, Ann Brassinga (Department of Microbiology,  
344 University of Manitoba), Jonathan J. Ewbank (Centre d'Immunologie de Marseille-Luminy, Aix-  
345 Marseille University, Marseille, France), Sabine Favre-Bonté (Université Lyon 1, UMR CNRS

346 5557 Ecologie Microbienne, Lyon, France), and the Laboratoire de santé publique du Québec for  
347 providing reference strains.

348 This work was supported by NSERC and CIHR through the IRC Industrial Chair on Drinking  
349 Water and the Collaborative Health Research Program funding (CHRP 523790-18).

350

351

## 352 **References**

- 353 1. Regev-Yochay G, Smollan G, Tal I, Pinas Zade N, Haviv Y, Nudelman V, Gal-Mor O,  
354 Jaber H, Zimlichman E, Keller N, Rahav G. 2018. Sink traps as the source of transmission  
355 of OXA-48-producing *Serratia marcescens* in an intensive care unit. *Infect Control Hosp*  
356 *Epidemiol* 39:1307–1315.
- 357 2. Bédard E, Laferrière C, Charron D, Lalancette C, Renaud C, Desmarais N, Déziel E,  
358 Prévost M. 2015. Post-outbreak investigation of *Pseudomonas aeruginosa* faucet  
359 contamination by quantitative polymerase chain reaction and environmental factors  
360 affecting positivity. *Infect Control Hosp Epidemiol* 36:1337–1343.
- 361 3. Lalancette C, Charron D, Laferrière C, Dolcé P, Déziel E, Prévost M, Bédard E. 2017.  
362 Hospital Drains as Reservoirs of *Pseudomonas aeruginosa*: multiple-locus variable-number  
363 of tandem repeats analysis genotypes recovered from faucets, sink surfaces and patients. 3.  
364 *Pathogens* 6:36.
- 365 4. Inouye M, Conway TC, Zobel J, Holt KE. 2012. Short read sequence typing (SRST): multi-  
366 locus sequence types from short reads. *BMC Genomics* 13:338.
- 367 5. Boers SA, Reijden WA van der, Jansen R. 2012. High-Throughput Multilocus Sequence  
368 Typing: Bringing Molecular Typing to the Next Level. *PLOS ONE* 7:e39630.
- 369 6. Sabat AJ, Budimir A, Nashev D, Sá-Leão R, Dijk JM van, Laurent F, Grundmann H,  
370 Friedrich AW, on behalf of the ESCMID Study Group of Epidemiological Markers  
371 (ESGEM). 2013. Overview of molecular typing methods for outbreak detection and  
372 epidemiological surveillance. *Eurosurveillance* 18:20380.



- 373 7. Basset P, Blanc DS. 2014. Fast and simple epidemiological typing of *Pseudomonas*  
374 *aeruginosa* using the double-locus sequence typing (DLST) method. *Eur J Clin Microbiol*  
375 *Infect Dis* 6.
- 376 8. de Been M, Pinholt M, Top J, Bletz S, Mellmann A, van Schaik W, Brouwer E, Rogers M,  
377 Kraat Y, Bonten M, Corander J, Westh H, Harmsen D, Willems RJJ. 2015. Core genome  
378 multilocus sequence typing scheme for high-resolution typing of *Enterococcus faecium*.  
379 *Journal of Clinical Microbiology* 53:3788–3797.
- 380 9. Chen Y, Frazzitta AE, Litvintseva AP, Fang C, Mitchell TG, Springer DJ, Ding Y, Yuan G,  
381 Perfect JR. 2015. Next generation multilocus sequence typing (NGMLST) and the analytical  
382 software program MLSTEZ enable efficient, cost-effective, high-throughput, multilocus  
383 sequencing typing. *Fungal Genetics and Biology* 75:64–71.
- 384 10. Tewolde R, Dallman T, Schaefer U, Sheppard CL, Ashton P, Pichon B, Ellington M, Swift  
385 C, Green J, Underwood A. 2016. MOST: a modified MLST typing tool based on short read  
386 sequencing. *PeerJ* 4:e2308.
- 387 11. Maiden MC, Bygraves JA, Feil E, Morelli G, Russell JE, Urwin R, Zhang Q, Zhou J, Zurth  
388 K, Caugant DA, others. 1998. Multilocus sequence typing: a portable approach to the  
389 identification of clones within populations of pathogenic microorganisms. *Proceedings of*  
390 *the National Academy of Sciences* 95:3140–3145.
- 391 12. Maiden MCJ, Jansen van Rensburg MJ, Bray JE, Earle SG, Ford SA, Jolley KA, McCarthy  
392 ND. 2013. MLST revisited: the gene-by-gene approach to bacterial genomics. *Nat Rev*  
393 *Microbiol* 11:728–736.
- 394 13. Bleidorn C, Gerth M. 2018. A critical re-evaluation of multilocus sequence typing (MLST)  
395 efforts in *Wolbachia*. *FEMS Microbiology Ecology* 94.

- 396 14. Grimont PAD, Grimont F. 1978. The Genus *Serratia*. *Annu Rev Microbiol* 32:221–248.
- 397 15. Hejazi A, Falkiner FR. 1997. *Serratia marcescens*. *Journal of Medical Microbiology*  
398 46:903–912.
- 399 16. Villari P, Crispino M, Salvadori A, Scarcella A. 2001. Molecular epidemiology of an  
400 outbreak of *Serratia marcescens* in a neonatal intensive care unit. *Infect Control Hosp*  
401 *Epidemiol* 22:630–634.
- 402 17. Assadian O, Berger A, Aspöck C, Mustafa S, Kohlhauser C, Hirschl AM. 2002. Nosocomial  
403 outbreak of *Serratia marcescens* in a neonatal intensive care unit. *Infect Control Hosp*  
404 *Epidemiol* 23:457–461.
- 405 18. Milisavljevic V, Wu F, Larson E, Rubenstein D, Ross B, Drusin LM, Della-Latta P, Saiman  
406 L. 2004. Molecular epidemiology of *Serratia marcescens* outbreaks in two neonatal  
407 intensive care units. *Infect Control Hosp Epidemiol* 25:719–722.
- 408 19. Maragakis LL, Winkler A, Tucker MG, Cosgrove SE, Ross T, Lawson E, Carroll KC, Perl  
409 TM. 2008. Outbreak of multidrug-resistant *Serratia marcescens* infection in a neonatal  
410 intensive care unit. *Infect Control Hosp Epidemiol* 29:418–423.
- 411 20. Zingg W, Soulake I, Baud D, Huttner B, Pfister R, Renzi G, Pittet D, Schrenzel J, Francois  
412 P. 2017. Management and investigation of a *Serratia marcescens* outbreak in a neonatal unit  
413 in Switzerland – the role of hand hygiene and whole genome sequencing. *Antimicrobial*  
414 *Resistance & Infection Control* 6:125.
- 415 21. Åttman E, Korhonen P, Tammela O, Vuento R, Aittoniemi J, Syrjänen J, Mattila E,  
416 Österblad M, Huttunen R. 2018. A *Serratia marcescens* outbreak in a neonatal intensive

- 417 care unit was successfully managed by rapid hospital hygiene interventions and screening.  
418 *Acta Paediatrica* 107:425–429.
- 419 22. Martineau C, Li X, Lalancette C, Perreault T, Fournier E, Tremblay J, Gonzales M, Yergeau  
420 É, Quach C. 2018. *Serratia marcescens* outbreak in a neonatal intensive care unit: new  
421 insights from next-generation sequencing applications. *Journal of Clinical Microbiology*  
422 56:235-18.
- 423 23. Moles L, Gómez M, Moroder E, Jiménez E, Escuder D, Bustos G, Melgar A, Villa J, del  
424 Campo R, Chaves F, Rodríguez JM. 2019. *Serratia marcescens* colonization in preterm  
425 neonates during their neonatal intensive care unit stay. *Antimicrobial Resistance & Infection*  
426 Control 8:135.
- 427 24. Cristina ML, Sartini M, Spagnolo AM. 2019. *Serratia marcescens* infections in neonatal  
428 intensive care units (NICUs). 4. *International Journal of Environmental Research and Public*  
429 *Health* 16:610.
- 430 25. Varsha G, Shiwani S, Kritika P, Poonam G, Deepak A, Jagdish C. 2021. *Serratia* no longer  
431 an opportunistic uncommon pathogen – case series & review of literature. *Infectious*  
432 *Disorders - Drug Targets* 21:1–1.
- 433 26. Johnson J, Quach C. 2017. Outbreaks in the neonatal ICU: a review of the literature. *Current*  
434 *Opinion in Infectious Diseases* 30:395–403.
- 435 27. Friedman ND, Kotsanas D, Brett J, Billah B, Korman TM. 2008. Investigation of an  
436 outbreak of *Serratia marcescens* in a neonatal unit via a case-control study and molecular  
437 typing. *American Journal of Infection Control* 36:22–28.

- 438 28. Rossen JWA, Dombrecht J, Vanfleteren D, Bruyne KD, Belkum A van, Rosema S, Lokate  
439 M, Bathoorn E, Reuter S, Grundmann H, Ertel J, Higgins PG, Seifert H. 2019.  
440 Epidemiological typing of *Serratia marcescens* isolates by whole-genome multilocus  
441 sequence typing. *Journal of Clinical Microbiology* 57:1652-1618.
- 442 29. Liu Y-Y, Chiou C-S, Chen C-C. 2016. PGADB-builder: A web service tool for creating pan-  
443 genome allele database for molecular fine typing. *Scientific Reports* 6:36213.
- 444 30. Hall, T.A. 1999. BioEdit: a user-friendly biological sequence alignment editor and analysis  
445 program for Windows 95/98/NT. *Nucl Acids Symp Ser* 95–98.
- 446 31. Figueras MJ, Beaz-Hidalgo R, Hossain MJ, Liles MR. 2014. Taxonomic affiliation of new  
447 genomes should be verified using average nucleotide identity and multilocus phylogenetic  
448 analysis. *Genome Announc* 2:927–914.
- 449 32. Pritchard L, Glover RH, Humphris S, Elphinstone JG, Toth IK. 2015. Genomics and  
450 taxonomy in diagnostics for food security: soft-rotting enterobacterial plant pathogens. *Anal*  
451 *Methods* 8:12–24.
- 452 33. R Core Team. 2021. R: A language and environment for statistical computing. R Foundation  
453 for Statistical Computing, Vienna, Austria.
- 454 34. Suzuki R, Shimodaira H. 2006. *Pvclust*: an R package for assessing the uncertainty in  
455 hierarchical clustering. *Bioinformatics* 22:1540–1542.
- 456 35. Galili T. 2015. *dendextend*: an R package for visualizing, adjusting and comparing trees of  
457 hierarchical clustering. *Bioinformatics* 31:3718–3720.
- 458 36. Wickham H, Averick M, Bryan J, Chang W, McGowan LD, François R, Grolemund G,  
459 Hayes A, Henry L, Hester J, Kuhn M, Pedersen TL, Miller E, Bache SM, Müller K, Ooms J,

- 460 Robinson D, Seidel DP, Spinu V, Takahashi K, Vaughan D, Wilke C, Woo K, Yutani H.  
461 2019. Welcome to the *Tidyverse*. *Journal of Open Source Software* 4:1686.
- 462 37. Gu Z, Gu L, Eils R, Schlesner M, Brors B. 2014. *circlize* implements and enhances circular  
463 visualization in R. *Bioinformatics* 30:2811–2812.
- 464 38. Gu Z, Eils R, Schlesner M. 2016. Complex heatmaps reveal patterns and correlations in  
465 multidimensional genomic data. *Bioinformatics* 32:2847–2849.
- 466 39. Ye J, Coulouris G, Zaretskaya I, Cutcutache I, Rozen S, Madden TL. 2012. Primer-BLAST:  
467 A tool to design target-specific primers for polymerase chain reaction. *BMC Bioinformatics*  
468 13:134.
- 469 40. Berkowitz DM, Lee WS. 1973. A selective medium for isolation and identification of  
470 *Serratia marcescens*. *Abstracts of the Annual Meeting of the American Society for*  
471 *Microbiology* 1973 105.
- 472 41. Durand A-A, Bergeron A, Constant P, Buffet J-P, Déziel E, Guertin C. 2015. Surveying the  
473 endomicrobiome and ectomicrobiome of bark beetles: The case of *Dendroctonus simplex*. 1.  
474 *Scientific Reports* 5:17190.
- 475 42. Martin M. 2011. Cutadapt removes adapter sequences from high-throughput sequencing  
476 reads. 1. *EMBnet.journal* 17:10–12.
- 477 43. Callahan BJ, McMurdie PJ, Rosen MJ, Han AW, Johnson AJA, Holmes SP. 2016. DADA2:  
478 High-resolution sample inference from Illumina amplicon data. 7. *Nature Methods* 13:581–  
479 583.
- 480 44. Morgan M, Lawrence M, Anders S. 2021. ShortRead: FASTQ input and manipulation.  
481 *Bioconductor version: Release (3.12)*.

- 482 45. Pagès H, Aboyou P, Gentleman R, DebRoy S. 2021. *Biostrings*: Efficient manipulation of  
483 biological strings. *Bioconductor version: Release (3.12)*.
- 484 46. Nascimento M, Sousa A, Ramirez M, Francisco AP, Carriço JA, Vaz C. 2017. PHYLOViZ  
485 2.0: providing scalable data integration and visualization for multiple phylogenetic inference  
486 methods. *Bioinformatics* 33:128–129.
- 487 47. Bolger AM, Lohse M, Usadel B. 2014. *Trimmomatic*: a flexible trimmer for Illumina  
488 sequence data. *Bioinformatics* 30:2114–2120.
- 489 48. Prjibelski A, Antipov D, Meleshko D, Lapidus A, Korobeynikov A. 2020. Using SPAdes  
490 De Novo Assembler. *Current Protocols in Bioinformatics* 70:e102.
- 491 49. Wick RR, Schultz MB, Zobel J, Holt KE. 2015. *Bandage*: interactive visualization of de  
492 novo genome assemblies. *Bioinformatics* 31:3350–3352.
- 493 50. Assefa S, Keane TM, Otto TD, Newbold C, Berriman M. 2009. ABACAS: algorithm-based  
494 automatic contiguation of assembled sequences. *Bioinformatics* 25:1968–1969.
- 495 51. Richter M, Rosselló-Móra R. 2009. Shifting the genomic gold standard for the prokaryotic  
496 species definition. *PNAS* 106:19126–19131.
- 497 52. Kurtz S, Phillippy A, Delcher AL, Smoot M, Shumway M, Antonescu C, Salzberg SL.  
498 2004. Versatile and open software for comparing large genomes. *Genome Biol* 5:R12.
- 499 53. Diggle SP, Whiteley M. 2020. Microbe Profile: *Pseudomonas aeruginosa*: opportunistic  
500 pathogen and lab rat. *Microbiology (Reading)* 166:30–33.
- 501 54. Freschi L, Vincent AT, Jeukens J, Emond-Rheault J-G, Kukavica-Ibrulj I, Dupont M-J,  
502 Charette SJ, Boyle B, Levesque RC. 2019. The *Pseudomonas aeruginosa* pan-genome

- 503 provides new insights on its population structure, horizontal gene transfer, and  
504 pathogenicity. *Genome. Biology and Evolution* 11:109–120.
- 505 55. Iguchi A, Nagaya Y, Pradel E, Ooka T, Ogura Y, Katsura K, Kurokawa K, Oshima K,  
506 Hattori M, Parkhill J, Sebaihia M, Coulthurst SJ, Gotoh N, Thomson NR, Ewbank JJ,  
507 Hayashi T. 2014. Genome evolution and plasticity of *Serratia marcescens*, an important  
508 multidrug-resistant nosocomial pathogen. *Genome Biol Evol* 6:2096–2110.
- 509 56. Ewing B, Green P. 1998. Base-calling of automated sequencer traces using *Phred*. II. Error  
510 Probabilities. *Genome Res* 8:186–194.
- 511 57. Franco LC, Tanner W, Ganim C, Davy T, Edwards J, Donlan R. 2020. A microbiological  
512 survey of handwashing sinks in the hospital built environment reveals differences in patient  
513 room and healthcare personnel sinks. 1. *Scientific Reports* 10:8234.
- 514 58. Wingender J. 2011. Hygienically relevant microorganisms in biofilms of man-made water  
515 systems, p. 189–238. *In* Flemming, H-C, Wingender, J, Szewzyk, U (eds.), *Biofilm*  
516 *Highlights*. Springer, Berlin, Heidelberg.
- 517 59. Gaiarsa S, Batisti Biffignandi G, Esposito EP, Castelli M, Jolley KA, Brisse S, Sasser D,  
518 Zarrilli R. 2019. Comparative analysis of the two *Acinetobacter baumannii* multilocus  
519 sequence typing (MLST) schemes. *Front Microbiol* 10:930.
- 520 60. Steinegger M, Salzberg SL. 2020. Terminating contamination: large-scale search identifies  
521 more than 2,000,000 contaminated entries in GenBank. *Genome Biology* 21:115.
- 522 61. Magalhães B, Valot B, Abdelbary MMH, Prod'hom G, Greub G, Senn L, Blanc DS. 2020.  
523 Combining standard molecular typing and whole genome sequencing to investigate  
524 *Pseudomonas aeruginosa* epidemiology in intensive care units. *Front Public Health* 8:3.

525 **Tables**

| <b>Locus</b> |                | <b>Primer sequence (5' - 3')</b> | <b>PCR amplicon length</b> | <b>PCR cycle conditions</b>                                                                                                                                 |
|--------------|----------------|----------------------------------|----------------------------|-------------------------------------------------------------------------------------------------------------------------------------------------------------|
| <i>gabR</i>  | Forward        | GAGCATCTGCGYAATATGCG             | 318                        | Initial denaturation at 95°C for 5 min, followed by 40 cycles at 95°C for 20 s, 58°C for 40 s, 72°C for 30 s and a final extension period of 5 min at 72°C. |
|              | Reverse        | CAGCGCGYTGAACACCTG               |                            |                                                                                                                                                             |
| <i>bssA</i>  | Forward        | CGCAGTTTCTCAACGCYATCG            | 242                        | Initial denaturation at 95°C for 5 min, followed by 35 cycles at 95°C for 20 s, 58°C for 40 s, 72°C for 30 s and a final extension period of 5 min at 72°C. |
|              | Reverse        | CGAATGGCCGTTGGATTTCGATC          |                            |                                                                                                                                                             |
| <i>dhaM</i>  | Forward primer | GGCGTCCAGCATYGCCTT               | 279                        | Initial denaturation at 95°C for 5 min, followed by 35 cycles at 95°C for 20 s, 60°C for 40 s, 72°C for 30 s and a final extension period of 5 min at 72°C. |
|              | Reverse primer | GACGTGCGCGACATGCTG               |                            |                                                                                                                                                             |

526 **Table 1: HiSST locus specific primers sequences and PCR cycle conditions**\*

527

528 \*Illumina linker sequences were added at each 3'-end sequence of primers: 5'-

529 TCGTCGGCAGCGTCAGATGTGTATAAGAGACAG-3' for forward and 5'-

530 GTCTCGTGGGCTCGGAGATGTGTATAAGAGACAG-3' for reverse primers.

531

532



533 **Table 2. Reference strains utilized as positive or negative control for HiSST scheme**  
 534 **validation.** Ten strains of *Serratia* spp. were included to verify the specificity for *S. marcescens*  
 535 of each selected locus, with *S. ficaria* ( $n = 1$ ), *S. liquefaciens* ( $n = 5$ ), *S. quinivorans* ( $n = 2$ ), *S.*  
 536 *proteamaculans* ( $n = 2$ ), also downloaded from NCBI Genome database. These *Serratia* spp.  
 537 have the most similar nucleotide sequences of selected locus according to the results of BLAST  
 538 run.  
 539

| Species and strains<br>(additional designation) | Lab<br>collection<br># | Isolation origin (country)                                  | Provided by                                              |
|-------------------------------------------------|------------------------|-------------------------------------------------------------|----------------------------------------------------------|
| <i>Serratia marcescens</i> ( $n = 15$ )         |                        |                                                             |                                                          |
| PCI 1107 (ATCC 14756, LMG<br>13576)             | ED3691                 | Fort Detrick, Maryland<br>(USA)                             | BCCM-LMG <sup>c</sup>                                    |
| BD1b-2wD                                        | ED4305                 | Drain water from a NICU<br>(Canada)                         | Lab strain                                               |
| Db11                                            | ED3837                 | Insect isolate, <i>Drosophila<br/>melanogaster</i> (France) | A. Brassinga <sup>a</sup> ; J. J.<br>Ewbank <sup>b</sup> |
| Db10                                            | ED3838                 | Insect isolate, <i>Drosophila<br/>melanogaster</i> (France) | A. Brassinga <sup>a</sup> ; J. J.<br>Ewbank <sup>b</sup> |
| BS 303 (ATCC 13880, LMG 2792)                   | ED3696                 | Pond water (Czech Republic)                                 | BCCM-LMG <sup>c</sup>                                    |
| L00128734                                       | ED3957                 | Human clinical specimen<br>(Canada)                         | LSPQ <sup>d</sup>                                        |
| L00128736                                       | ED3958                 | Human clinical specimen<br>(Canada)                         | LSPQ <sup>d</sup>                                        |
| L00128737                                       | ED3959                 | Human clinical specimen<br>(Canada)                         | LSPQ <sup>d</sup>                                        |
| L00128966                                       | ED3960                 | Human clinical specimen<br>(Canada)                         | LSPQ <sup>d</sup>                                        |
| L00128967                                       | ED3961                 | Human clinical specimen<br>(Canada)                         | LSPQ <sup>d</sup>                                        |
| L00129585                                       | ED3962                 | Human clinical specimen<br>(Canada)                         | LSPQ <sup>d</sup>                                        |
| L00130169                                       | ED3963                 | Human clinical specimen<br>(Canada)                         | LSPQ <sup>d</sup>                                        |
| L00133794                                       | ED3964                 | Human clinical specimen<br>(Canada)                         | LSPQ <sup>d</sup>                                        |
| L00134617                                       | ED3965                 | Human clinical specimen<br>(Canada)                         | LSPQ <sup>d</sup>                                        |
| L00085643                                       | ED3966                 | Environmental (Canada)                                      | LSPQ <sup>d</sup>                                        |
| <i>Serratia rubidaea</i> ( $n = 1$ )            |                        |                                                             |                                                          |
| FB299                                           | ED3693                 | Environmental (USA)                                         | Bernier <i>et al.</i> , 1994                             |

| Species and strains<br>(additional designation)                                          | Lab<br>collection<br>#                                                                       | Isolation origin (country)              | Provided by                          |
|------------------------------------------------------------------------------------------|----------------------------------------------------------------------------------------------|-----------------------------------------|--------------------------------------|
| <i>Serratia liquefaciens</i> (n = 1)<br>ID150497                                         | ED3967                                                                                       | Human clinical specimen<br>(Canada)     | LSPQ <sup>d</sup>                    |
| <i>Serratia plymuthica</i> (n = 1)<br>ID157970                                           | ED3968                                                                                       | Human clinical specimen<br>(Canada)     | LSPQ <sup>d</sup>                    |
| <i>Stenotrophomonas maltophilia</i> (n = 4)<br>560 (ATCC 13636, LMG 961, NCTC<br>10258)  | ED3699                                                                                       | Human, cerebrospinal fluid<br>(USA)     | BCCM-LMG <sup>c</sup>                |
| L00083595                                                                                | ED3969                                                                                       | Human clinical specimen<br>(Canada)     | LSPQ <sup>d</sup>                    |
| L00092250                                                                                | ED3970                                                                                       | Human clinical specimen<br>(Canada)     | LSPQ <sup>d</sup>                    |
| L00124341                                                                                | ED3971                                                                                       | Human clinical specimen<br>(Canada)     | LSPQ <sup>d</sup>                    |
| <i>Stenotrophomonas acidaminiphila</i> (n = 1)<br>L00129488                              | ED3979                                                                                       | Human clinical specimen<br>(Canada)     | LSPQ <sup>d</sup>                    |
| <i>Stenotrophomonas nitritireducens</i> (n = 1)<br>ATCC BAA-12 (LMG 22074, DSM<br>12575) | ED3701                                                                                       | Laboratory scale biofilter<br>(Germany) | BCCM-LMG <sup>c</sup>                |
| <i>Pseudomonas aeruginosa</i> (n = 3)<br>UCBPP-PA14                                      | ED1                                                                                          | Human clinical specimen<br>(USA)        | Daniel G Lee <i>et al.</i> ,<br>2006 |
| PAO1                                                                                     | ED956                                                                                        | Human, wound (Australia)                | Sylvie Chevalier <sup>e</sup>        |
| FKS4A                                                                                    | ED0129                                                                                       | Human, cystic fibrosis (USA)            | Luke Hoffman <sup>f</sup>            |
| <i>Klebsiella pneumoniae</i> (n = 1)<br>ATCC 4352 (LMG 3128)                             | ED3692                                                                                       | Cow's milk                              | ATCC <sup>g</sup>                    |
| 540                                                                                      | <sup>a</sup> Ann Brassinga, University of Manitoba, Winnipeg, MB, Canada.                    |                                         |                                      |
| 541                                                                                      | <sup>b</sup> Jonathan J. Ewbank, University of Aix-Marseille, Marseille, France.             |                                         |                                      |
| 542                                                                                      | <sup>c</sup> Belgian Coordinated Collections of Microorganisms, University of Gent, Belgium. |                                         |                                      |
| 543                                                                                      | <sup>d</sup> Laboratoire de Santé Publique du Québec, Sainte-Anne-de-Bellevue, QC, Canada.   |                                         |                                      |
| 544                                                                                      | <sup>e</sup> Sylvie Chevalier, University of Rouen-Normandie, Rouen, France.                 |                                         |                                      |
| 545                                                                                      | <sup>f</sup> Luke Hoffman, Seattle Children's, Seattle, WA, USA.                             |                                         |                                      |
| 546                                                                                      | <sup>g</sup> American Type Culture Collection, Rockville, MD, USA.                           |                                         |                                      |

## 547 **Figures**

548 **Figure 1: Step-by-step approach of the method used to develop the HiSST scheme of *S.***  
549 ***marcescens*.**

550  
551 **Figure 2: Convergent classification of *S. marcescens* strains based on the HiSST scheme and**  
552 **whole genome sequences.** UPGMA dendrogram based on the ANIb score of concatenated loci  
553 selected for (A) HiSST scheme and (B) genome similarity to discriminate strains of *Serratia*  
554 *marcescens*.

555  
556 **Figure 3: Discrimination of *Serratia* spp. based on the HiSST scheme and whole genome**  
557 **sequences.** The heat-map reports the ANIb score of (A) the three concatenated loci of the HiSST  
558 scheme and (B) genome similarity. *S. ficaria* (n=1), *S. quinivorans* (n=2), *S. proteamaculans*  
559 (n=1) and *S. liquefaciens* (n=5) were included as outgroup.

560  
561 **Figure 4: Minimum spanning trees based on SNP analysis of *S. marcescens* and eDNA,**  
562 **using *S. marcescens* Db10 as a reference.** The distance labels represent the number of  
563 discriminating SNPs between neighbouring genotypes. Each pie chart label refers to ST identifier  
564 of the corresponding locus. Reference genomes are represented in grey and isolates or sampled  
565 sinks are represented by the colour legend in pie charts. Dominant STs of eDNA are represented  
566 with red font characters in the legend box whereas grey characters correspond to ST of eDNA in  
567 low abundance.

568  
569 **Figure 5: Relationship amongst the ST profile of reference strains and isolates and diversity**  
570 **coverage of the HiSST scheme.** (A) A minimum spanning tree based on MLST analysis of  
571 HiSST scheme is represented with distance labels corresponding to the number of discriminating

572 alleles and pie chart labels referring to the ST identifier of the HiSST scheme. Orange nodes  
573 correspond to clinical isolates, the red node to the isolate from NICU sink-drain, and the green  
574 nodes to environmental isolates. In the legend box, strains represented by red font characters  
575 correspond to unknown clinical (ED3957, ED3958, ED3959) and sink-drain (BD1b-2wD)  
576 isolates from this study. (B) Cumulative frequency of ST depending on the number of loci  
577 included in the HiSST scheme.

578  
579 **Figure 6: Survey of *Serratia marcescens* in sink drains of a NICU.** (A) A Scheme of the  
580 surveyed NICU is depicted along an (B) UPGMA dendrogram based on Jaccard distance  
581 computed with the HiSST profile of *gabR*, *bssA* and *dhaM* loci amongst sink drains that showed  
582 positive PCR amplifications.

583

## 584 **Supplementary figures**

585 **Figure S1: UPGMA trees of each locus selected for HiSST scheme between *Serratia sp.***  
586 **strains and environmental ASV, based on Jukes-Cantor distance.** Each cluster gathers strains  
587 with more than 90% of similarity.

588

589 **Figure S2: UPGMA trees for topological data analysis of concatenated loci selected for**  
590 **HiSST scheme based on ANIb score between *Serratia sp.* strains.** Each cluster gathers strains  
591 with more than 85% of nucleotide similarity.

592

593 **Figure S3: Tests and validation *in-vitro* of primers designed for HiSST scheme.**

1

# Bourdin et al., 2021 (HiSST scheme of *Serratia marcescens*): Figures and supplementary materials

2

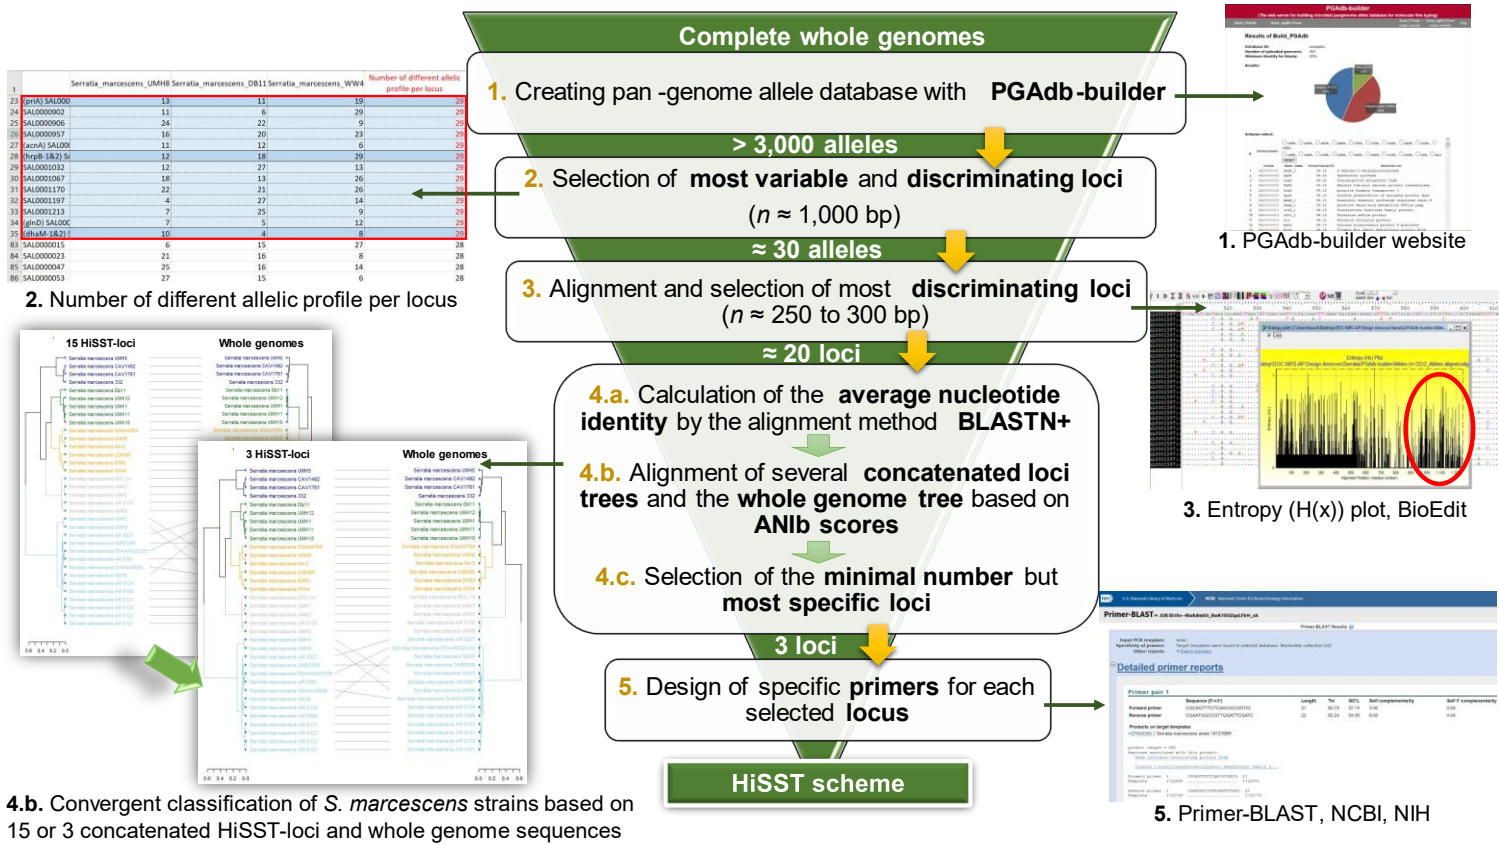

3

4

Figure 1: Step-by-step approach of the method used to develop the HiSST scheme of *S. marcescens*.

5

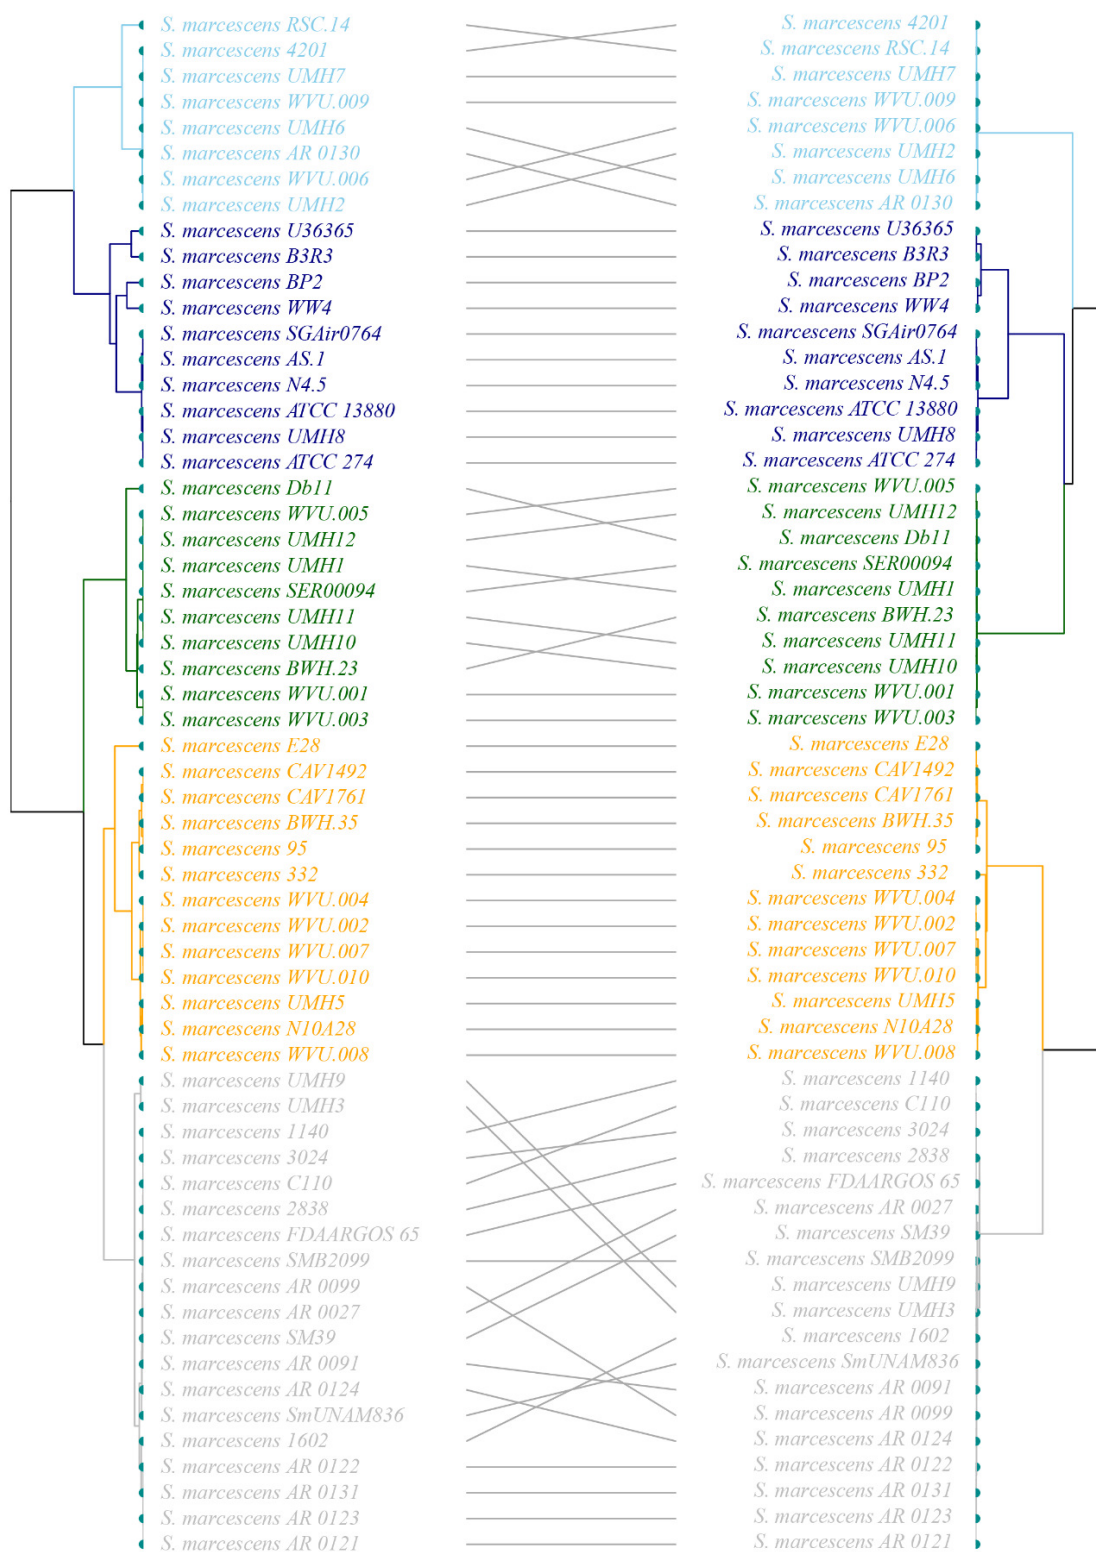

**Figure 2: Convergent classification of *S. marcescens* strains based on the HiSST**

**scheme and whole genome sequences.** UPGMA dendrogram based on the ANIb score of concatenated loci selected for (A) HiSST scheme and (B) genome similarity to discriminate strains of *Serratia marcescens*.

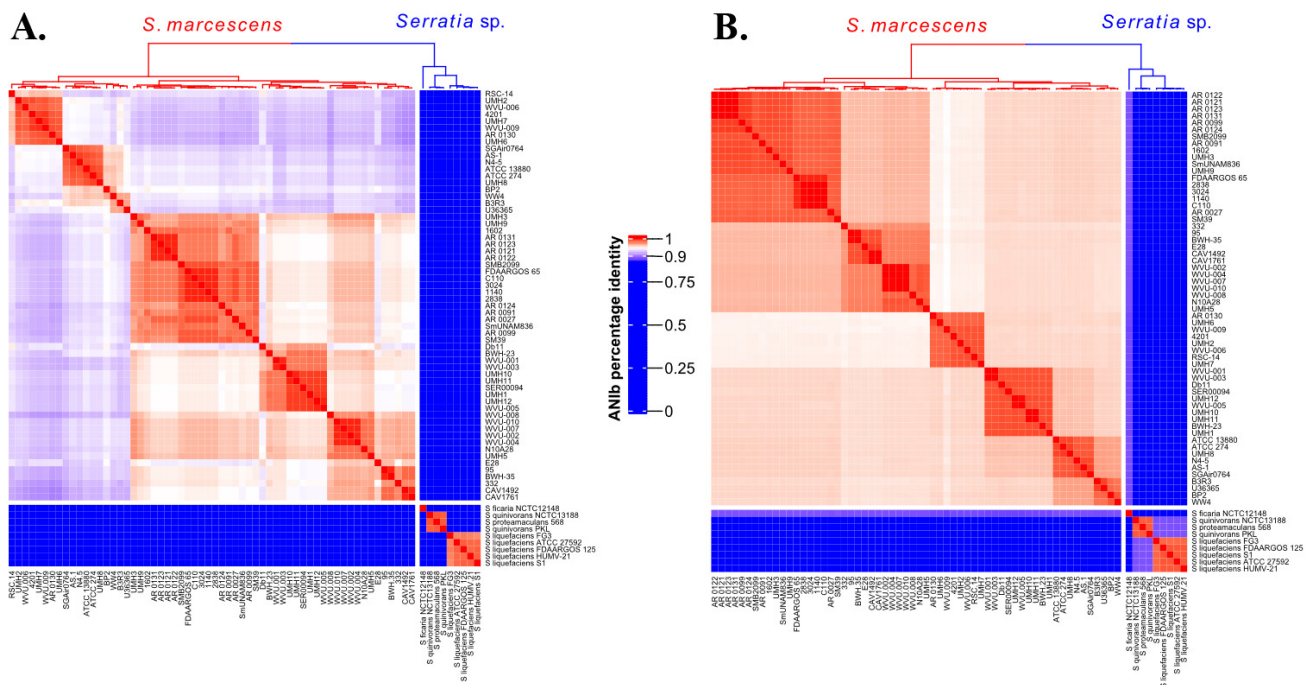

11

12 **Figure 3: Discrimination of *Serratia* spp. based on the HiSST scheme and whole genome**

13 **sequences.** The heat-map reports the ANIb score of (A) the three concatenated loci of the HiSST

14 scheme and (B) genome similarity. *S. ficaria* (n=1), *S. quinivorans* (n=2), *S. proteamaculans* (n=1)

15 and *S. liquefaciens* (n=5) were included as outgroup.

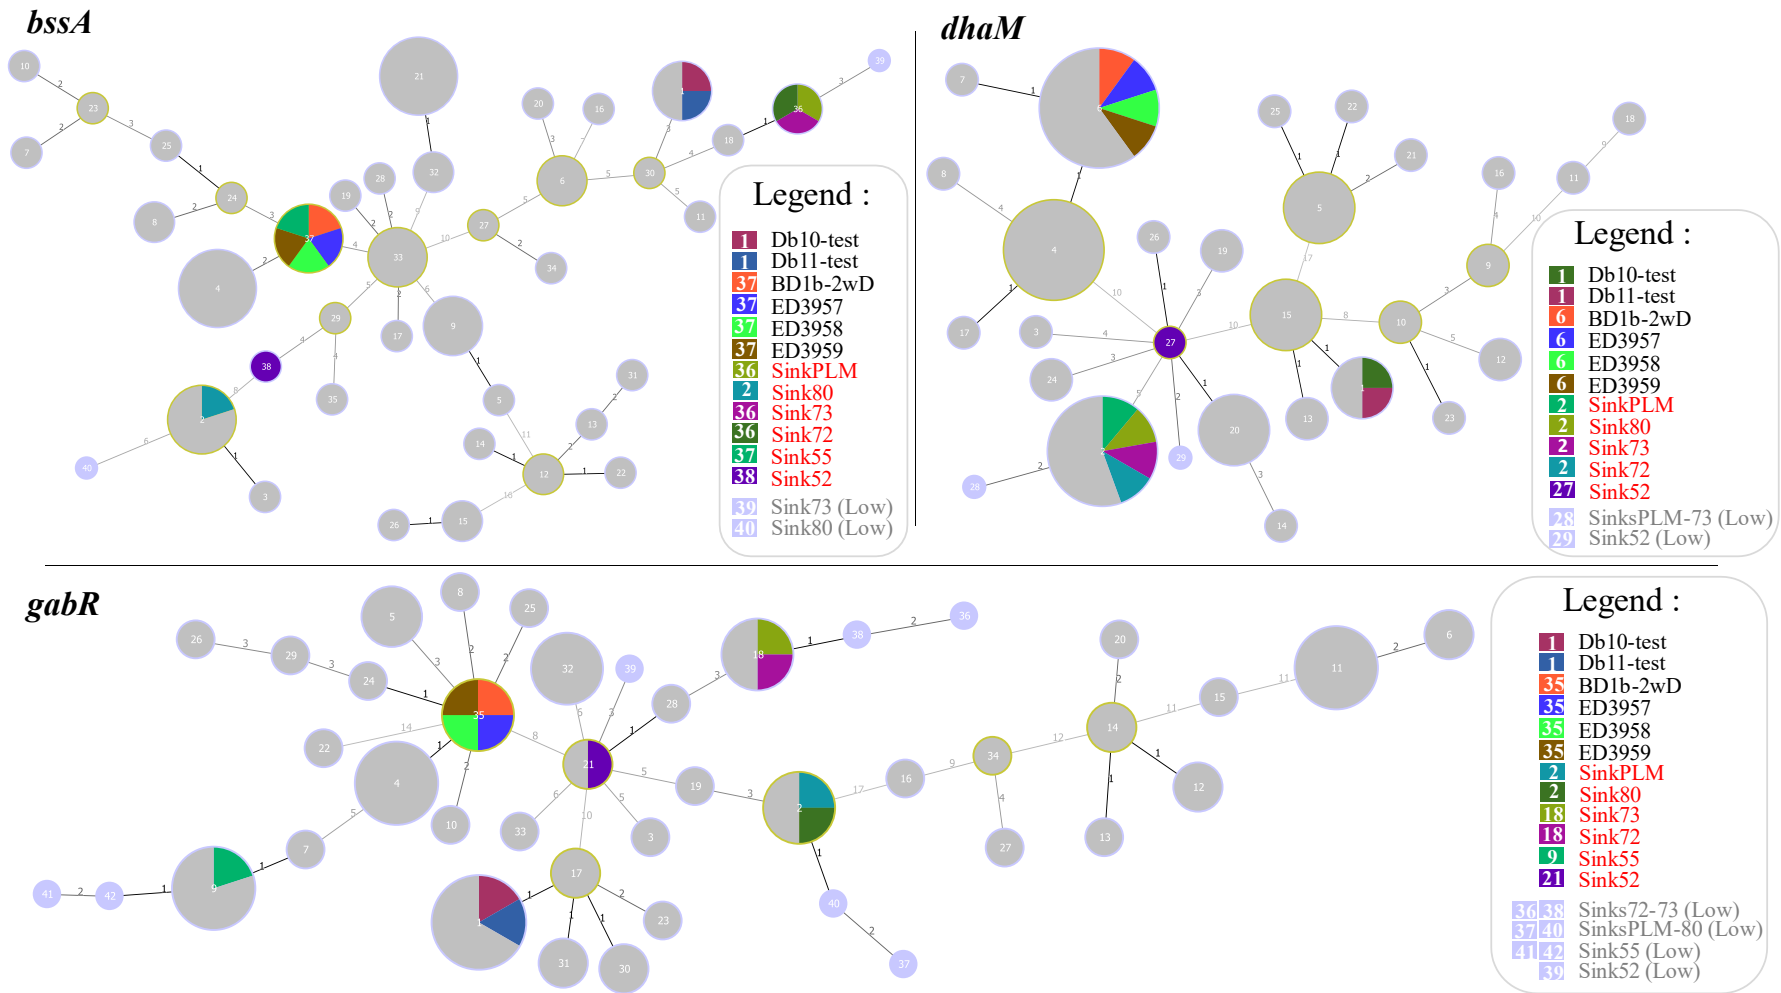

16

17 **Figure 4: Minimum spanning trees based on SNP analysis of *S. marcescens* and eDNA, using *S. marcescens* Db10 as a reference. The distance**  
 18 **labels represent the number of discriminating SNPs between neighbouring genotypes. Each pie chart label refers to ST identifier of the**  
 19 **corresponding locus. Reference genomes are represented in grey and isolates or sampled sinks are represented by the colour legend in pie charts.**



20 Dominant STs of eDNA are represented with red font characters in the legend box whereas grey characters correspond to ST of eDNA in low  
21 abundance.

22

A.

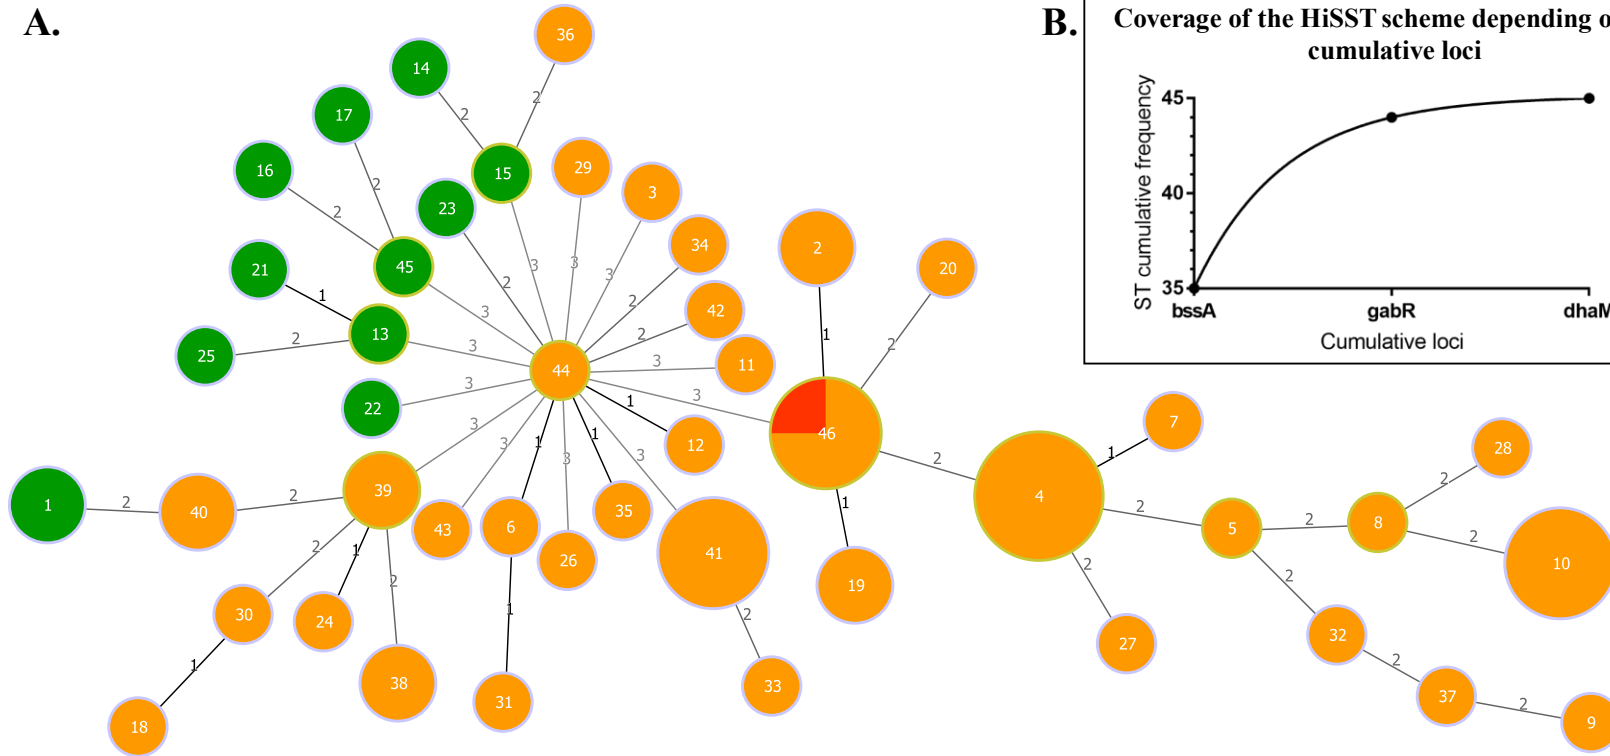

B.

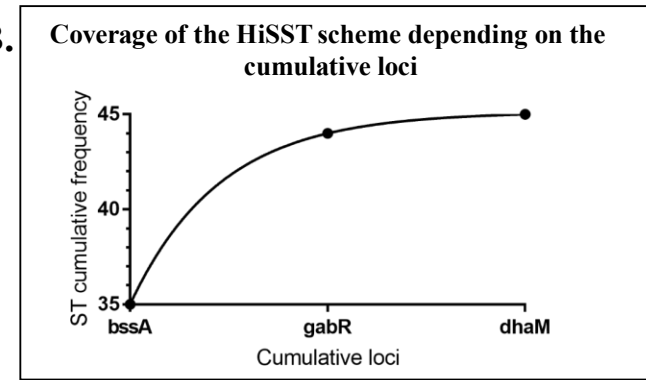

**Legend :**

|        |            |               |               |              |            |            |             |
|--------|------------|---------------|---------------|--------------|------------|------------|-------------|
| 1 Db11 | 7 AR_0027  | 13 AS-1       | 19 CAV1761    | 27 SMB2099   | 33 UMH5    | 39 WVU-005 | 46 BD1b-2wD |
| 1 Db10 | 8 AR_0091  | 15 ATCC 13880 | 20 E28        | 28 SmUNAM836 | 34 UMH6    | 42 WVU-006 | 46 ED3957   |
| 4 1140 | 9 AR_0099  | 14 ATCC 274   | 4 FDAARGOS 65 | 29 U36365    | 35 UMH7    | 41 WVU-007 | 46 ED3958   |
| 5 1602 | 10 AR_0121 | 17 BP2        | 22 N10A28     | 30 UMH1      | 36 UMH8    | 43 WVU-008 | 46 ED3959   |
| 4 2838 | 10 AR_0122 | 18 BWH-23     | 21 N4-5       | 38 UMH10     | 37 UMH9    | 44 WVU-009 |             |
| 4 3024 | 10 AR_0123 | 2 BWH-35      | 23 RSC-14     | 38 UMH11     | 40 WVU-001 | 41 WVU-010 |             |
| 3 332  | 11 AR_0124 | 16 B3R3       | 24 SER00094   | 39 UMH12     | 41 WVU-002 | 45 WW4     |             |
| 6 4201 | 12 AR_0130 | 4 C110        | 25 SGAir0764  | 31 UMH2      | 40 WVU-003 |            |             |
| 2 95   | 10 AR_0131 | 19 CAV1492    | 26 SM39       | 32 UMH3      | 41 WVU-004 |            |             |

**Sample type :**  
● Clinical  
● NICU sink  
● Environmental

**Figure 5: Relationship amongst the ST profile of reference strains and isolates and diversity coverage of the HiSST scheme. (A) A**

minimum spanning tree based on MLST analysis of HiSST scheme is represented with distance labels corresponding to the number of

26 discriminating alleles and pie chart labels referring to the ST identifier of the HiSST scheme. Orange nodes correspond to clinical isolates, the red  
27 node to the isolate from NICU sink-drain, and the green nodes to environmental isolates. In the legend box, strains represented by red font characters  
28 correspond to unknown clinical (ED3957, ED3958, ED3959) and sink-drain (BD1b-2wD) isolates from this study. (B) Cumulative frequency of  
29 ST depending on the number of loci included in the HiSST scheme.

30

31

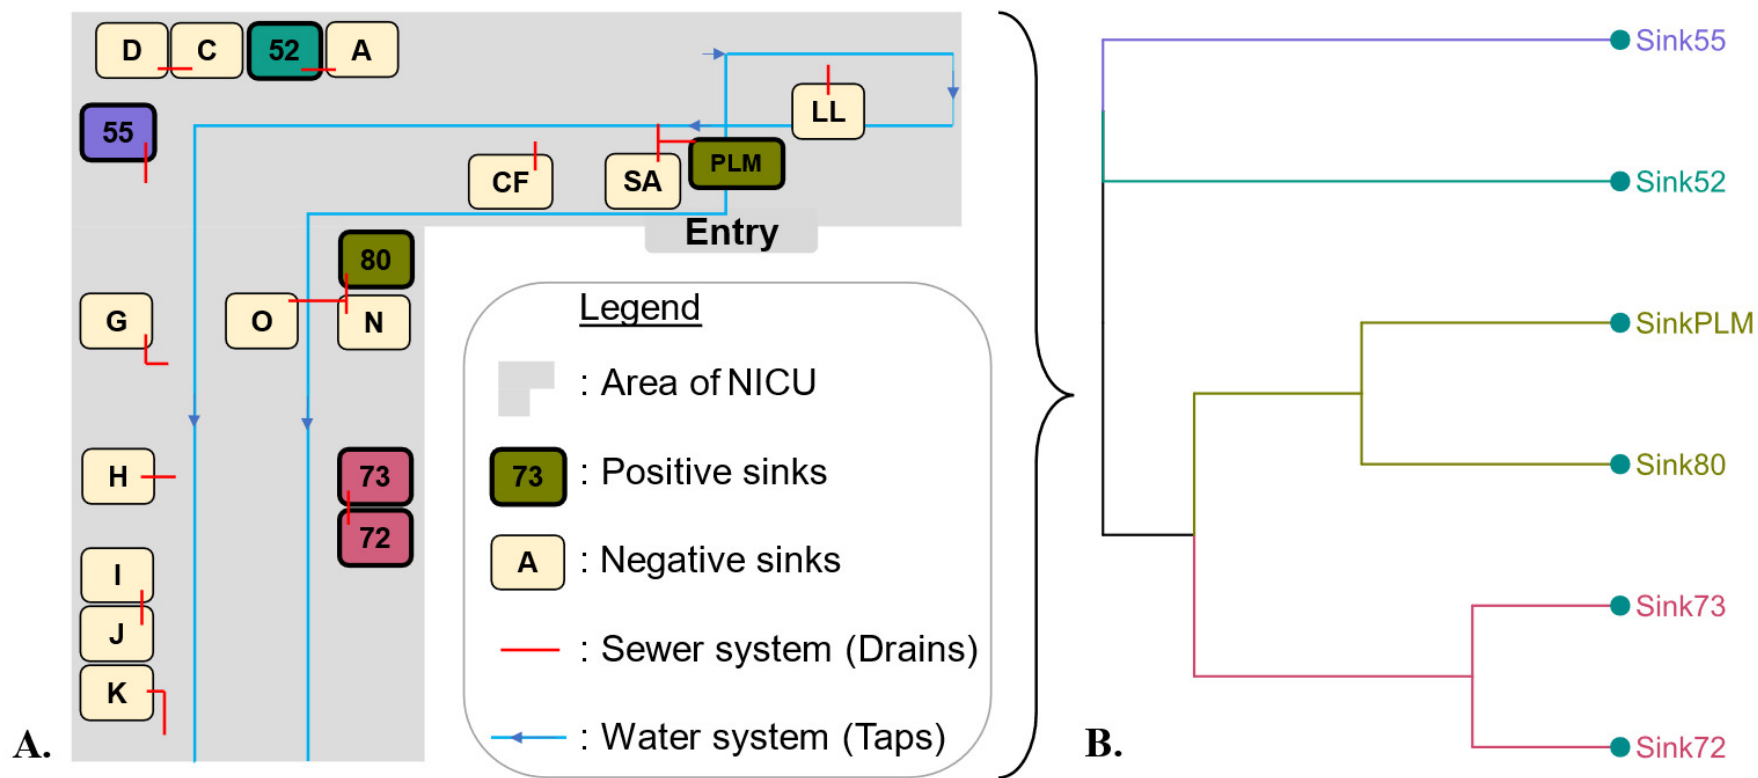

32

33 **Figure 6: Survey of *Serratia marcescens* in sink drains of a NICU.** (A) A Scheme of the surveyed NICU is depicted along an (B) UPGMA  
 34 dendrogram based on Jaccard distance computed with the HiSST profile of *gabR*, *bssA* and *dhaM* loci amongst sink drains that showed positive  
 35 PCR amplifications.

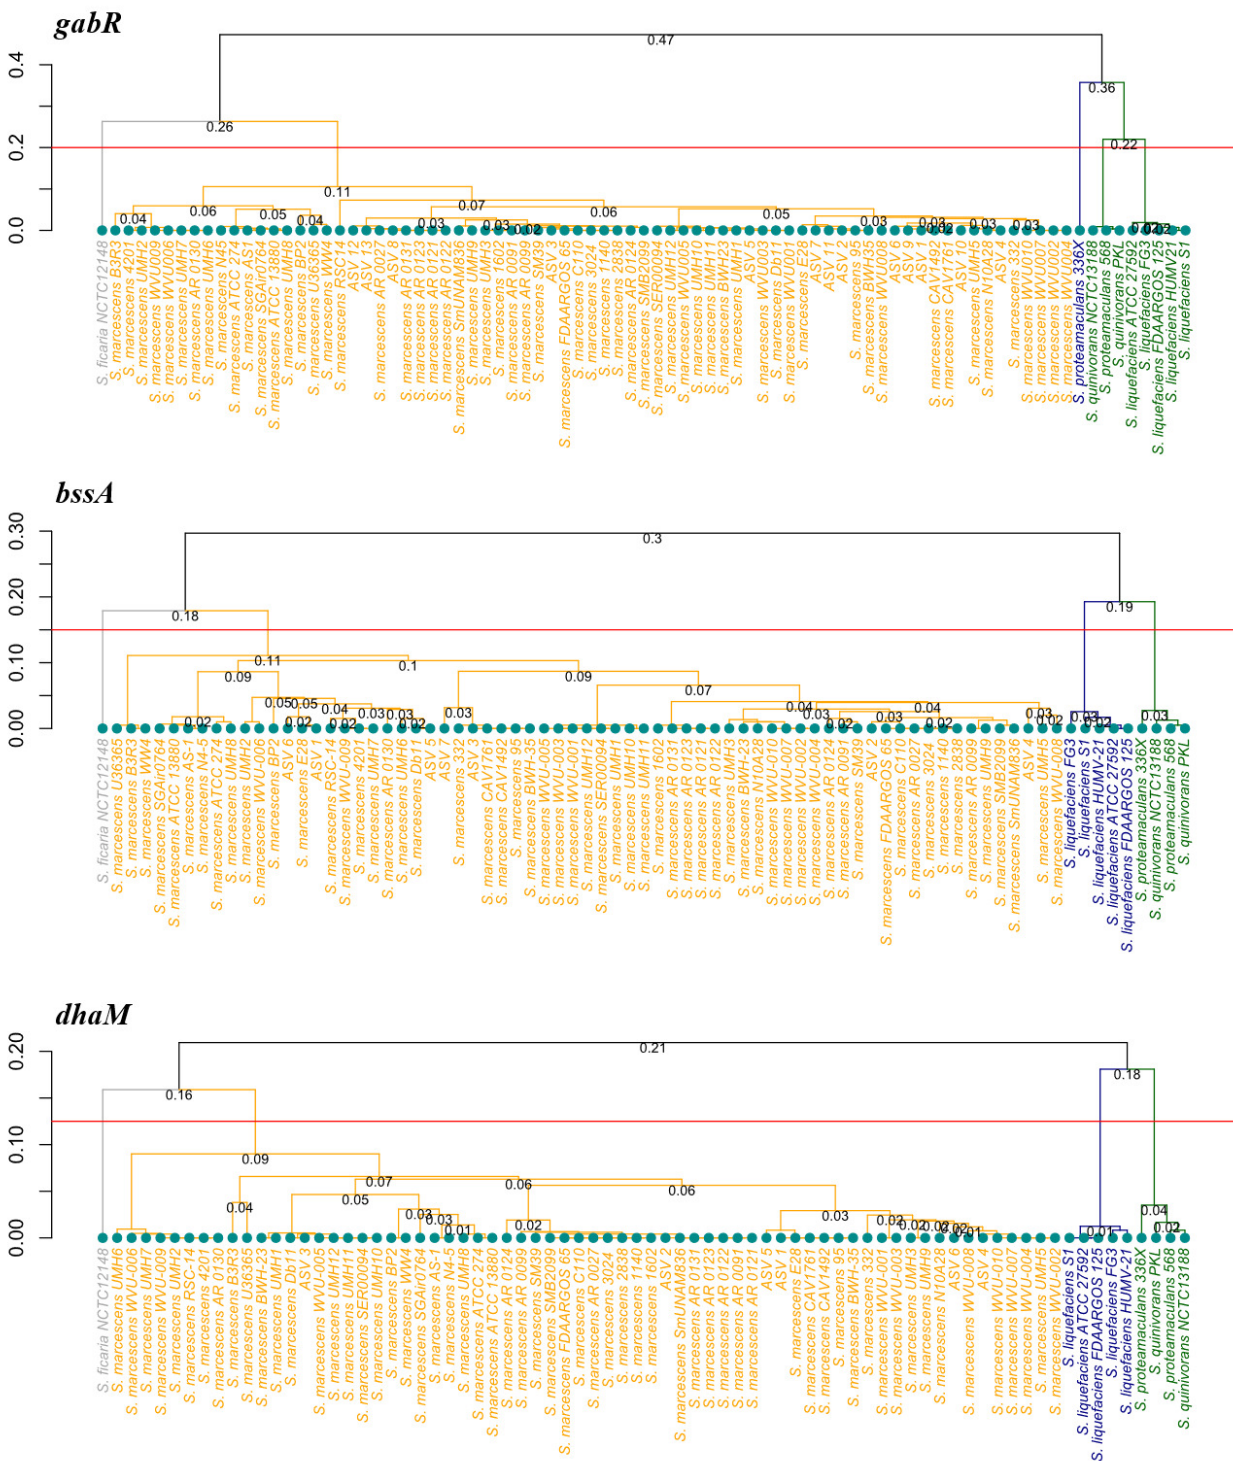

**Figure S1: UPGMA trees of each locus selected for HiSST scheme between *Serratia* sp. strains and environmental ASV, based on Jukes-Cantor distance. Each cluster gathers strains with more than 90% of similarity.**

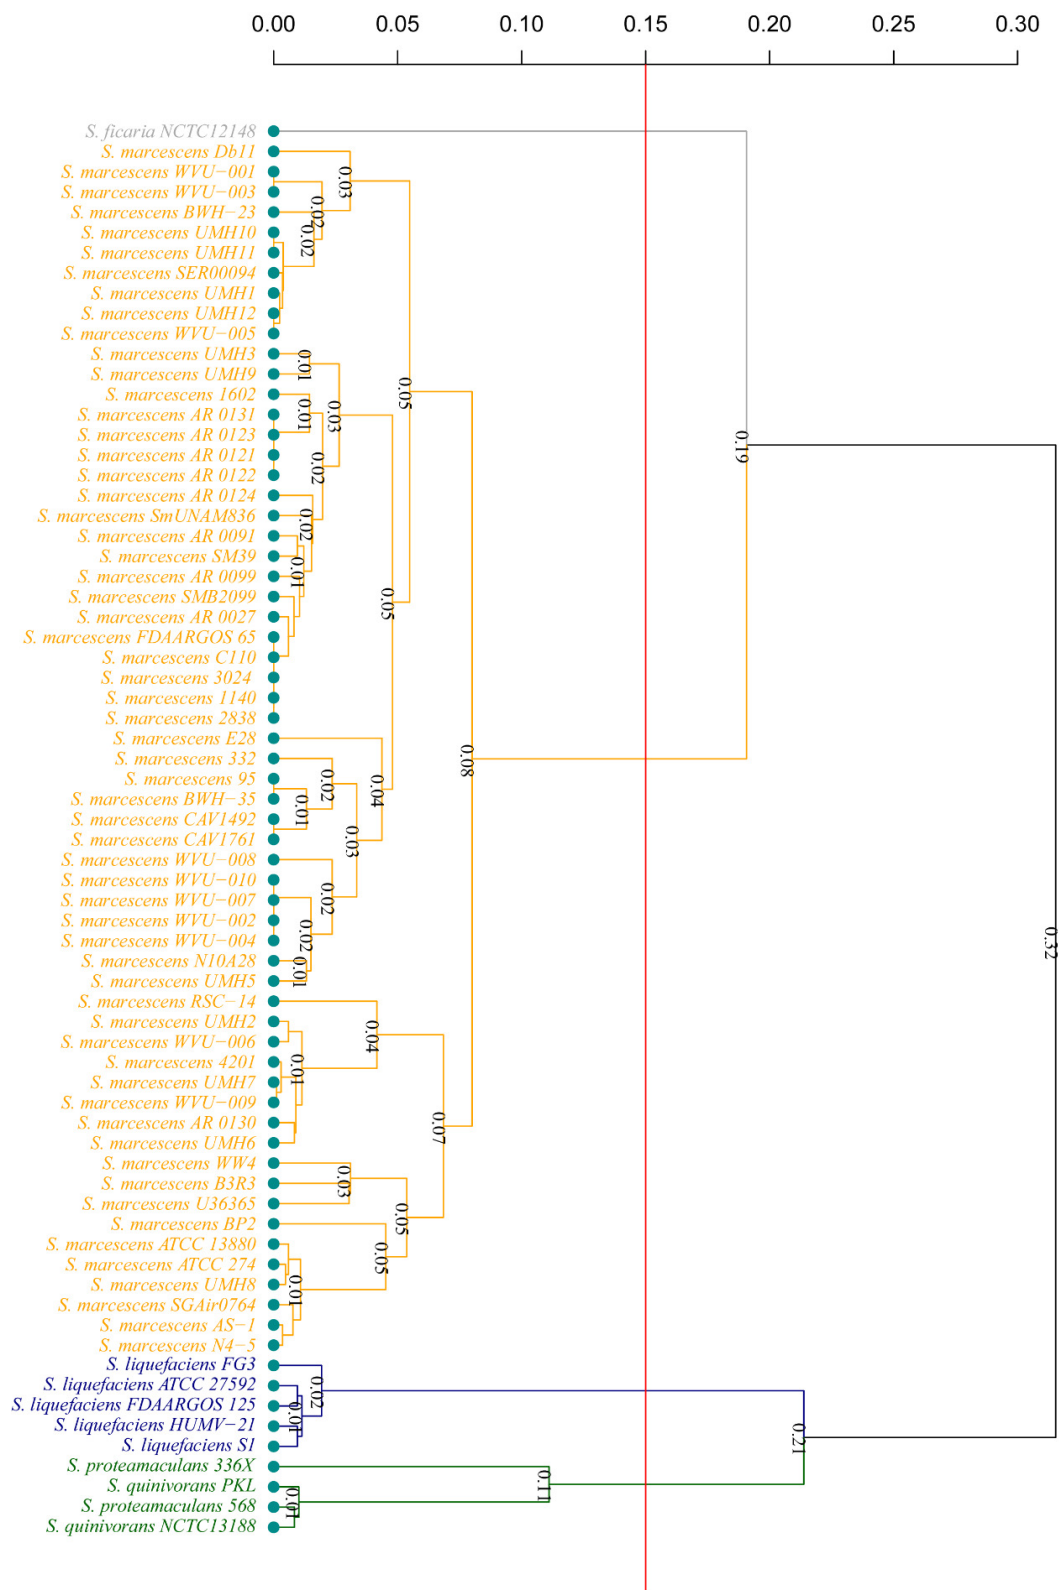

**Figure S2: UPGMA trees for topological data analysis of concatenated loci selected for HiSST scheme based on ANiB score between *Serratia* sp. strains. Each cluster gathers strains with more than 85% of nucleotide similarity.**

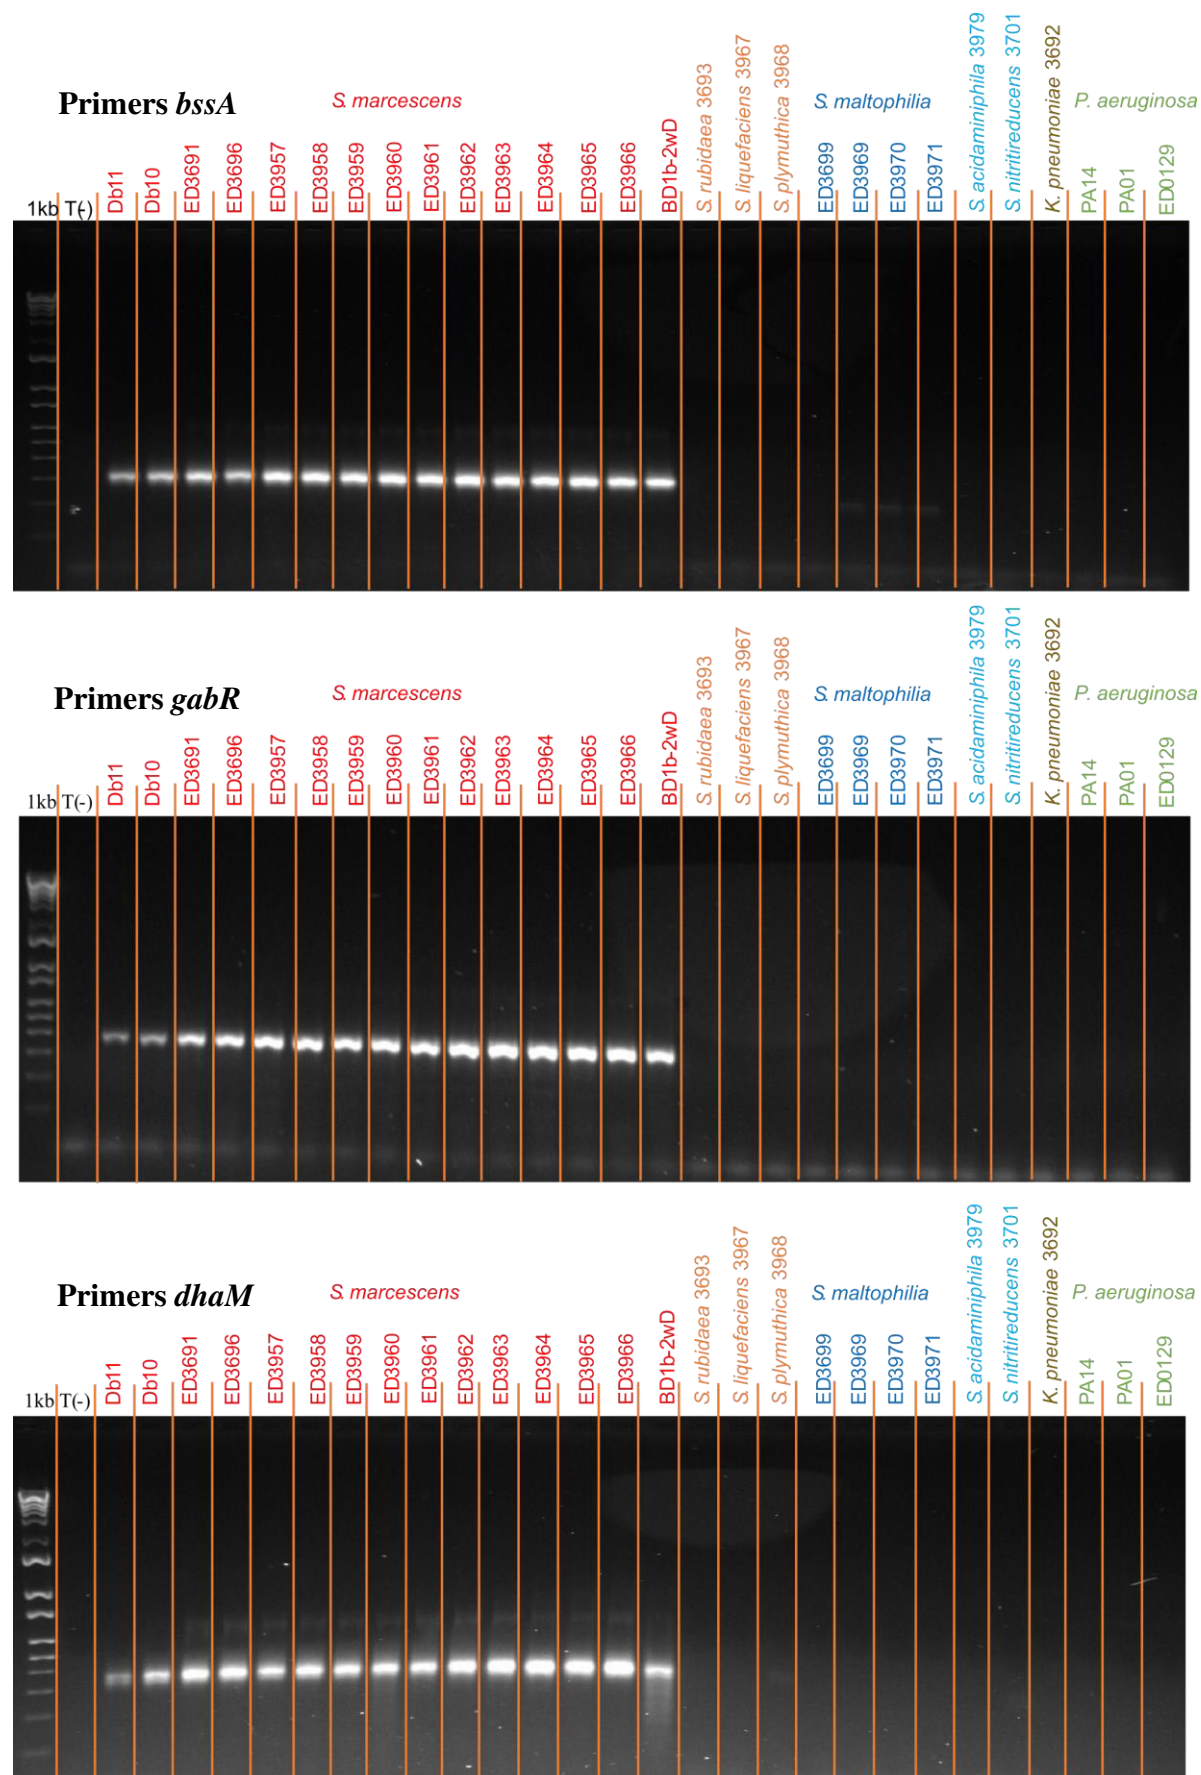

Figure S3: Tests and validation *in-vitro* of primers designed for HiSST scheme.
